# Supplementary material for: A novel nutritional index as a predictor of mortality in dilated cardiomyopathy: a retrospective study
Source: PeerJ. 2022 Jan 19;10:e12704. doi: 10.7717/peerj.12704 (PMC8783563; doi:10.7717/peerj.12704)
Supplement: Supplemental Information 1 [file peerj-10-12704-s001.xlsx]

## Sheet: raw data
time/days	Status（die=1；censored=0）	TCBI	TCBI tertiles	GNRI	PNI	CONUTscore	Age	gender	height	Body weight	BMI	Current smoking	Diabetes	Atrial fibrillation	Prior Stroke	Symptom duration	Previous ICD/CRT	Heart rate at admission	Systolic blood pressure	Diastotic blood pressure	NYHA class	White blood cell	Hemoglobin	Neutrophils	Lymphocyte	Albumin	Urea	Creatinine	Uric acid	K+	Na+	Total cholesterol	Triglyceride	HDL cholesterol	LDL cholesterol	NT-proBNP	LVEDD	LVESD	LVEF	Beta-blocker	ACEI/ARBs	Diuretics	Digoxin
1198	1	213.72	T1	79.8874	36.4	6	68	Male	152	40	17.313	No	No	No	No	0.7	No	73	80	54	2	6.38	62	5.05	0.9	31.9	33.93	514	622	4.61	131.5	100.542	53.142	24.3621	56.0715	21192	59	45	44	No	No	Yes	No
2194	0	250.368	T1	94.5595	52	3	63	Female	150	50	22.2222	No	No	Yes	No	3	No	74	101	68	3	7.3	115	2.3	3.3	35.5	3.7	51	320	3.53	139.5	83.1405	60.2276	20.8818	51.0444	16815	52	45	30	Yes	Yes	Yes	Yes
12	1	272.356	T1	98.4561	44.05	5	68	Male	164	56	20.8209	Yes	No	Yes	No	10	No	85	118	79	4	5.57	107.5	3.54	0.77	40.2	19.28	217	684	6.12	135.6	109.823	44.285	36.7365	55.2981	29157	56	50	23	Yes	Yes	Yes	Yes
10	1	280.896	T1	80.7403	38.25	5	79	Male	150	42	18.6667	No	Yes	No	No	5	No	73	110	63	3	8.32	105.6	6.01	1.51	30.7	4.38	132	303	3.98	135.3	109.436	61.1133	27.069	61.872	8785	75	64	21	No	No	Yes	Yes
1081	0	284.612	T1	97.0453	45.45	4	70	Male	160	56	21.875	No	No	Yes	Yes	1	No	112	86	69	3	6.27	96	3.92	1.51	37.9	9.49	141	644	3.78	134	80.8203	62.8847	22.4286	39.0567	21157	63	56	27	Yes	No	Yes	Yes
1107	0	296.604	T1	92.4564	52.7	2	49	Female	155	42	17.4818	No	No	No	No	0.1	No	110	87	61	3	7.19	108.1	4.09	2.56	39.9	8.99	80	458	3.94	136.5	100.929	69.9703	21.6552	68.0592	6890	67	52	42	Yes	Yes	Yes	No
692	0	301.551	T1	85.0317	44.7	4	48	Female	155	46	19.1467	No	No	No	No	2	No	87	88	69	3	6.5	97.2	3.26	2.38	32.8	8.5	87	337	3.87	137.5	127.611	51.3706	19.335	95.5149	5718	72	65	21	Yes	Yes	Yes	Yes
218	1	314.418	T1	83.2859	38	5	48	Male	159	48.5	19.1844	No	No	No	No	3	No	83	87	56	4	6.39	120.6	4.13	1.2	32	5.31	79	424	3.81	137.9	130.705	49.5992	37.8966	82.7538	7438	71	60	32	Yes	Yes	Yes	Yes
2194	0	316.265	T1	96.793	44.9	4	35	Female	150	50	22.2222	No	No	No	No	0.2	No	108	104	79	3	6.14	121.9	3.36	1.58	37	2.85	40	221	3.86	138.4	88.1676	71.7417	27.8424	40.6035	6481	58	47	41	Yes	No	Yes	Yes
33	1	321.577	T1	80.6085	51.6	4	15	Male	162	42	16.0037	No	No	No	No	0.2	No	63	108	74	4	9.48	111.6	5.46	3.48	34.2	6.08	59	462	4.3	134	101.702	75.2845	15.468	71.1528	25791	68	58	29	Yes	No	Yes	Yes
140	1	325.389	T1	95.027	44	4	59	Male	165	58	21.3039	No	No	Yes	Yes	3	No	58	95	72	4	11.6	150.6	8.93	1.34	37.3	8.47	115	448	3.68	138.2	90.4878	61.999	15.8547	69.9927	10235	76	58	44	Yes	No	Yes	Yes
1375	0	332.773	T1	93.8836	48.9	3	69	Male	168	50	17.7154	No	No	Yes	No	0.3	No	102	122	86	4	5.56	148	3.1	1.58	41	4.73	79	335	4.1	142.8	134.185	49.5992	44.0838	85.8474	2117	58	48	36	Yes	No	Yes	Yes
557	1	333.542	T1	99.8581	41.6	4	56	Female	154	57	24.0344	No	No	Yes	No	0.5	No	79	101	62	3	5.1	132	3.4	1	36.6	5.7	92	394	4.11	136.8	129.544	45.1707	50.6577	62.2587	4279	71	60	32	Yes	Yes	Yes	Yes
601	1	334.828	T1	105.4	49.25	4	79	Male	171	65	22.2291	Yes	Yes	Yes	No	2	Yes	78	142	78	3	4.48	75.3	2.73	1.23	43.1	11.09	117	566	4.32	136.9	90.8745	56.6848	30.1626	43.3104	3829	78	59	44	Yes	Yes	Yes	Yes
1081	1	335.957	T1	99.7918	47.2	3	50	Male	165	58	21.3039	Yes	Yes	Yes	No	0.5	No	110	111	78	3	4.71	125	2.57	1.34	40.5	7.75	89	802	3.71	139	116.783	49.5992	35.5764	68.8326	14877	67	59	27	No	Yes	Yes	Yes
254	1	346.103	T1	82.9175	44.4	2	77	Male	162	40	15.2416	Yes	Yes	No	Yes	5	No	81	93	69	2	5.99	146	3.52	1.54	36.7	7.9	131	382	3.54	136.8	155.067	55.7991	39.8301	92.808	13527	67	58	28	Yes	Yes	Yes	Yes
674	0	356.11	T1	92.5749	43.85	0	51	Male	155	51	21.2279	No	Yes	Yes	No	6	No	150	96	59	4	17.56	164	15.1	1.65	35.6	7.68	105	323	4.9	135.7	213.072	32.7709	45.2439	162.027	5899	60	55	20	Yes	Yes	Yes	No
545	1	357.914	T1	96.3681	40.85	5	66	Male	165	65	23.8751	No	No	No	Yes	1	No	81	106	51	4	5.48	136.9	3.56	1.17	35	19.45	118	480	3.31	141.1	90.1011	61.1133	15.0813	62.6454	4756	83	78	12	Yes	Yes	Yes	Yes
824	0	361.577	T1	92.7422	42.8	3	63	Female	154	46	19.3962	No	No	No	No	0.1	No	84	129	84	1	5.51	117.4	3.86	1.02	37.7	5.62	50	265	4.7	139	164.347	47.8278	52.2045	95.1282	547.9	62	52	32	Yes	Yes	Yes	Yes
759	0	364.139	T1	101.283	45.6	5	54	Male	168	59	20.9042	Yes	Yes	No	No	6	No	71	104	73	3	7.21	148.6	5.45	0.72	42	14.08	169	912	4.11	128.1	102.475	60.2276	20.8818	80.4336	13769	76	65	29	Yes	Yes	Yes	Yes
1618	0	365.818	T1	102.232	44.25	3	60	Male	160	65	25.3906	No	No	No	Yes	5	No	95	125	92	3	7.79	148.8	5.45	1.45	37	10.28	131	573	3.34	140	122.197	46.0564	28.6158	83.1405	12692	71	61	29	Yes	Yes	Yes	Yes
998	0	370.717	T1	74.1875	32.75	7	71	Male	156	45	18.4911	Yes	No	Yes	No	0.4	No	71	106	57	4	3.39	129.3	1.76	1.21	26.7	5.26	53	177	3.57	136	138.825	59.3419	36.3498	80.0469	10915	62	50	41	Yes	Yes	Yes	Yes
648	0	378.529	T1	103.097	36.9	7	76	Male	153	65	27.7671	No	No	No	No	0.2	No	114	111	74	3	5	142.8	4.02	0.5	34.4	13.63	119	643	4.63	138.3	134.185	43.3993	35.5764	76.1799	13037	59	52	24	Yes	Yes	Yes	No
1869	0	380.035	T1	96.0932	48.25	1	75	Female	136	36	19.4637	No	No	No	No	1	No	86	116	58	2	5.21	108.3	2.71	1.59	40.3	6.87	63	436	4.33	136.7	180.589	58.4562	71.5395	94.3548	2372	75	58	44	Yes	Yes	Yes	No
2026	0	386.666	T1	90.7025	47.4	2	36	Male	167	50	17.9282	Yes	No	No	No	5	No	72	86	64	3	6.78	147.1	4.44	1.76	38.6	7.11	76	518	3.62	141.9	130.318	59.3419	35.5764	76.9533	2405	84	72	30	Yes	Yes	Yes	Yes
288	1	387.359	T1	91.9656	40.4	4	63	Female	155	48	19.9792	No	Yes	No	No	3	No	81	110	77	4	4.7	134	3.2	0.8	36.4	7.56	67	478	4.4	136.1	118.33	68.1989	26.2956	72.6996	12695	73	59	43	Yes	Yes	Yes	No
1542	0	387.451	T1	80.4199	36.95	6	51	Male	162	47	17.9089	No	Yes	No	Yes	1	No	121	124	97	3	11.01	127.4	9.26	1.05	31.7	7.83	108	566	3.45	138.3	131.091	62.8847	28.6158	91.6479	15037	70	61	28	Yes	Yes	Yes	No
392	0	399.548	T1	106.109	50.35	3	50	Male	165	57	20.9366	No	No	No	No	1	No	117	101	81	4	7.15	144.8	5.48	1.03	45.2	15.23	156	753	5.12	132.8	146.559	47.8278	42.1503	93.9681	35000	73	66	22	Yes	No	Yes	Yes
1753	0	401.804	T1	82.6348	40	4	40	Male	170	55	19.0311	No	No	No	No	0.3	No	92	103	80	3	4.94	148.2	2.42	1.64	31.8	4.55	113	291	3.23	141.7	104.409	69.9703	29.7759	49.8843	3213	69	62	21	Yes	Yes	Yes	No
1888	0	403.183	T1	87.9436	38.1	5	64	Female	144	45.5	21.9425	No	No	No	No	0.4	No	93	114	74	3	7.6	98	5.7	1.3	31.6	5.46	61	258	4.42	140.5	113.69	77.9416	39.8301	54.9114	11207	58	47	39	Yes	Yes	Yes	No
919	0	404.178	T1	95.9455	46.15	2	27	Male	170	66	22.8374	No	No	No	No	0.1	No	114	102	57	4	8.89	146.6	6.24	2.03	36	12.04	109	612	4.02	135.4	115.237	53.142	27.069	73.473	1067	77	67	27	Yes	Yes	Yes	Yes
903	1	410.133	T1	98.6006	42.75	5	58	Male	165	58	21.3039	Yes	No	Yes	No	5	No	90	122	84	3	5	100.2	3.93	0.61	39.7	9.5	61	428	4.09	135.6	107.889	65.5418	26.6823	66.1257	14533	71	61	31	Yes	Yes	Yes	Yes
269	0	410.515	T1	90.8562	44.45	4	53	Female	157	43	17.4449	No	No	No	No	2	No	92	92	74	3	6.73	143.3	5.09	1.13	38.8	19.04	106	647	4.34	124.4	139.985	68.1989	23.202	106.729	15866	68	59	28	Yes	Yes	Yes	Yes
402	0	413.222	T1	98.5114	50.15	2	36	Female	151	46	20.1746	No	No	No	No	0.1	No	114	89	61	4	9.11	145.9	6.35	1.89	40.7	5.1	52	323	4.08	136.8	128.384	69.9703	42.1503	64.1922	3569	69	59	30	Yes	Yes	Yes	Yes
991	1	413.672	T1	85.315	47.6	1	25	Male	171	50	17.0993	Yes	No	No	No	1	No	88	98	69	3	6.59	132	3.54	2.32	36	3.67	77	398	4.05	137.2	141.532	58.4562	58.005	70.7661	3332	62	52	34	Yes	Yes	Yes	Yes
999	1	414.108	T1	88.0673	38.7	6	64	Female	150	49	21.7778	No	No	No	No	0.3	No	99	107	72	2	3.7	101.8	1.78	1.4	31.7	6.66	95	503	3.56	139.2	90.8745	92.9985	19.335	33.6429	16626	69	59	35	Yes	Yes	Yes	Yes
2282	0	416.094	T1	84.6846	49.55	4	21	Male	170	51	17.6471	Yes	No	Yes	Yes	0.6	No	174	98	70	3	13.09	132	9.2	2.93	34.9	4.45	84	530	4.9	139.5	110.983	73.5131	27.069	62.2587	5845	67	52	44	No	No	Yes	Yes
2006	0	420.042	T1	103.901	46.4	3	66	Male	172	70	23.6614	Yes	No	Yes	No	10	No	108	144	95	3	5.24	156.4	3.66	1.22	40.3	4.8	86	463	3.98	140	112.916	53.142	40.2168	62.6454	3226	66	52	42.2	Yes	Yes	Yes	Yes
274	0	421.056	T1	94.4965	43.0863	5	66	Male	163	63.5	23.9	Yes	No	No	No	2	No	76	114	72	4	5.68	148	5.20206	1.87726	33.7	8.01	90	237	3.88	137.7	93.5814	70.856	24.3621	54.9114	6059	72	62	28	Yes	Yes	Yes	Yes
2	1	421.39	T1	87.7722	44.85	3	66	Male	165	48	17.6309	No	Yes	No	Yes	3	No	70	116	63	1	4.91	129	2.75	1.57	37	2.74	72	370	4.08	139.3	137.665	63.7704	42.9237	62.6454	1229	58	48	34	Yes	Yes	Yes	No
1863	0	421.994	T1	93.6661	45.35	4	33	Female	150	50	22.2222	No	Yes	No	No	1	No	114	123	89	3	5.06	105.9	2.41	2.09	34.9	5.96	75	476	3.48	137.3	128.771	65.5418	34.803	78.5001	1625	69	54	43	Yes	Yes	Yes	Yes
545	0	424.793	T1	80.6583	39.15	5	38	Male	168	48	17.0068	Yes	No	No	No	0.6	No	129	121	90	4	13.38	146.6	9.61	1.23	33	5.04	81	442	4.66	128.7	123.357	71.7417	24.3621	70.3794	3560	59	50	31	Yes	Yes	Yes	Yes
804	0	430.112	T1	113.204	50.45	3	57	Male	162	70	26.6728	Yes	No	Yes	No	0.6	No	92	98	69	4	6.54	155.2	4.1	1.53	42.8	7.12	86	387	4.38	134	106.729	57.5705	28.2291	58.3917	2872	81	64	40	Yes	No	Yes	Yes
616	1	431.447	T1	82.0648	44.3	1	78	Male	180	50	15.4321	Yes	No	Yes	No	6	No	58	105	58	2	4.8	120.8	2.31	1.7	35.8	6.9	77	492	4.36	144	170.921	50.4849	32.0961	116.01	1973	82	67	36	Yes	Yes	Yes	No
48	1	431.838	T1	109.771	40	5	52	Male	165	79	29.0174	Yes	No	Yes	No	7	No	53	106	62	4	5.35	113.8	3.86	0.48	37.6	16.53	213	804	4.85	137	108.276	50.4849	26.6823	72.6996	14174	72	57	40	Yes	Yes	Yes	Yes
770	1	432.931	T1	102.644	43.45	4	65	Male	163	66	24.841	No	Yes	Yes	No	4	No	70	128	77	3	4.27	79.2	2.45	1.09	38	8.26	91	570	4.04	140.5	129.931	50.4849	46.7907	69.606	3310	56	40	44	Yes	No	Yes	Yes
514	0	434.016	T1	87.1712	40.4	5	71	Male	166	55	19.9594	Yes	No	No	No	0.1	Yes	45	138	80	4	9.16	98.4	6.62	1.34	33.7	6.46	95	213	5.21	128.5	111.37	70.856	26.2956	66.8991	25145	76	60	42	No	No	Yes	No
802	1	439.441	T1	95.0692	48	0	65	Male	165	55	20.202	Yes	No	No	No	1	No	86	110	77	4	5.79	130	3.25	1.86	38.7	4.29	106	502	4.2	146.1	187.936	42.5136	58.005	119.877	5224	58	45	44	Yes	Yes	Yes	No
21	1	440.181	T1	79.8175	35.1	6	57	Female	160	50	19.5312	No	Yes	No	Yes	1	No	112	100	72	4	7.31	144.1	5.27	1.3	28.6	11.26	77	669	3.88	132.4	157.774	55.7991	23.9754	116.397	21634	77	66	30	Yes	No	Yes	No
584	0	440.942	T1	98.8757	53.85	0	52	Female	160	43	16.7969	No	No	No	No	0.2	Yes	90	106	78	3	8.32	129.6	5.84	1.79	44.9	7.24	71	388	3.54	139.3	192.963	53.142	56.4582	102.475	1275	60	52	28	Yes	Yes	Yes	Yes
569	0	441.14	T1	90.7717	45.4	2	69	Male	165	50	18.3655	No	Yes	Yes	No	2	No	89	127	70	3	7.95	151.9	5.39	1.46	38.1	10.64	146	691	3.41	140.1	142.306	61.999	45.6306	67.6725	10522	56	46	36	Yes	Yes	Yes	Yes
1878	0	442.467	T1	85.5796	39.05	6	77	Male	168	53	18.7783	Yes	Yes	No	No	6	No	98	116	79	4	5.91	133.2	4.08	0.99	34.1	5.1	107	305	5.22	138.7	125.678	66.4275	50.6577	58.005	6821	71	59	34	Yes	Yes	Yes	No
652	1	443.812	T1	94.2145	45.5	4	72	Male	183	76	22.694	Yes	No	Yes	No	1	No	100	114	80	3	6.89	131.3	3.63	2.14	34.8	3.22	82	370	3.45	138.2	119.877	48.7135	34.803	67.2858	3102	68	64	13	Yes	Yes	Yes	Yes
1835	0	444.885	T1	87.916	37.2	6	50	Male	170	63	21.7993	Yes	No	No	No	0.6	No	99	159	83	2	3.49	89.3	1.48	1.06	31.9	5.76	112	459	3.9	138.9	130.705	54.0277	32.8695	80.4336	5001	70	57	38	No	Yes	Yes	No
668	0	456.319	T1	92.0485	44.55	3	36	Male	175	57	18.6122	No	No	No	No	0.2	No	68	174	106	2	4.97	136.9	2.84	1.19	38.6	5.66	90	392	3.65	136.4	145.786	54.9134	42.1503	79.6602	3875	64	51	41	Yes	Yes	Yes	No
1579	0	457.865	T1	95.0916	39.4	5	65	Male	165	64	23.5078	No	Yes	No	No	0.1	No	98	146	86	4	8.06	123.5	6.54	0.96	34.6	10.62	100	519	4.08	147.1	144.239	49.5992	46.7907	82.7538	5960	58	52	24	Yes	Yes	Yes	Yes
11	1	458.522	T1	84.4383	41.45	3	59	Male	162	51	19.433	Yes	Yes	No	No	0.2	No	108	98	67	3	8.79	139.8	5.83	1.79	32.5	10.96	117	417	3.81	134.5	145.013	61.999	25.1355	109.436	9027	61	54	26	Yes	No	Yes	No
280	1	461.545	T1	94.6775	47.35	2	65	Female	150	43	19.1111	No	No	Yes	No	0.7	No	55	136	75	3	7.86	148.5	5.42	1.57	39.5	5.92	54	422	3.69	134.9	157.387	68.1989	37.5099	95.1282	18053	65	57	25	Yes	Yes	Yes	Yes
1682	0	463.866	T1	91.7657	54.25	1	62	Female	148	41	18.718	No	No	Yes	No	0.6	No	78	114	78	4	8.52	147.4	4.19	3.23	38.1	5.77	88	305	3.96	137.8	165.894	68.1989	54.138	103.636	6431	65	50	43	Yes	Yes	Yes	Yes
122	1	466.074	T1	93.6671	42.4	4	41	Male	158	63	25.2363	No	Yes	No	No	0.1	No	102	117	83	4	4.2	132	1.5	2.2	31.4	4.13	86	333	3.69	135.2	104.409	70.856	11.2143	78.5001	5452	70	63	20	Yes	Yes	Yes	No
4	1	470.047	T1	99.9599	49.05	2	52	Female	153	50	21.3593	No	Yes	Yes	No	7	Yes	86	110	74	3	5.31	129.1	3.02	1.79	40.1	6.58	53	745	3.9	141.4	112.916	83.2558	30.5493	72.3129	6170	84	74	29	Yes	Yes	Yes	Yes
2105	0	471.45	T1	112.208	49.85	2	51	Male	167	79	28.3266	No	No	No	No	0.6	No	84	142	104	4	6.73	151.8	3.93	1.95	40.1	6.27	130	736	4	142.6	102.089	58.4562	24.3621	62.2587	6481	67	55	36	Yes	Yes	Yes	Yes
1566	0	472.181	T1	101.345	46.55	3	63	Female	155	55	22.8928	No	No	No	No	0.1	No	67	134	70	3	4.83	133.9	2.88	1.51	39	4.77	48	441	4.06	137.3	116.783	73.5131	39.4434	103.636	6481	57	48	34	Yes	Yes	Yes	No
297	0	474.853	T1	78.1802	42.4	3	59	Female	142	36	17.8536	No	No	Yes	No	3	No	87	104	72	2	5.59	123	2.53	2.44	30.2	3.24	63	401	2.83	142.3	179.429	73.5131	39.4434	121.037	4335	65	55	30	Yes	Yes	Yes	Yes
435	0	480.87	T1	105.984	55.8	3	18	Male	175	65	21.2245	No	No	No	Yes	0.3	No	108	128	68	3	7.86	157.1	4.85	2.22	44.7	6.77	88	684	3.38	139.4	92.808	79.713	32.8695	43.6971	5468	77	69	22	Yes	Yes	Yes	Yes
644	0	483.383	T1	80.8784	37	5	74	Male	160	45	17.5781	Yes	Yes	Yes	No	10	No	76	91	67	4	8.39	128.8	5.87	0.92	32.4	11.72	91	665	4.05	141.7	153.52	69.9703	49.4976	76.5666	16572	76	64	26	Yes	Yes	Yes	Yes
1222	1	488.342	T1	101.492	64.85	2	17	Female	152	46	19.91	No	No	No	No	0.2	No	147	86	54	3	12.82	137.3	7.22	4.37	43	5.06	51	418	4.91	134.6	110.983	95.6556	33.6429	61.872	5709	61	54	22	Yes	Yes	Yes	Yes
1840	0	489.732	T1	107.335	52	2	60	Female	148	46.5	21.229	No	No	No	No	0.99	No	96	106	74	4	3.87	115.5	2.14	1.32	45.4	7.33	73	315	4.16	145.1	145.013	72.6274	44.0838	83.1405	10179	65	50	44	Yes	Yes	Yes	Yes
665	0	490.924	T1	104.343	57.65	2	43	Male	176	59.5	19.2084	Yes	No	Yes	No	0.1	No	81	112	91	3	5.39	152.3	2.14	2.31	46.1	6.29	76	503	4.63	141.6	127.611	64.6561	31.7094	75.4065	7076	56	45	41	No	No	Yes	No
543	0	491.008	T1	103.739	44.45	4	53	Male	169	80	28.0102	No	No	No	No	5	No	95	106	69	4	5.74	141.5	3.2	1.93	34.8	8.58	79	571	3.35	142.9	123.744	49.5992	31.3227	72.3129	6445	81	70	29	Yes	Yes	Yes	Yes
328	1	496.899	T1	98.7897	47.1	2	77	Male	155	45	18.7305	Yes	No	No	No	1	No	99	155	90	2	7.32	127.1	5.97	0.84	42.9	6.34	93	397	3.28	142.7	201.084	54.9134	48.3375	143.466	3902	71	61	29	Yes	Yes	Yes	Yes
370	1	500.618	T1	92.3155	38.35	5	65	Female	154	58	24.4561	No	Yes	No	Yes	1	No	70	90	65	3	7.01	134	4.57	1.47	31	4.02	71	431	3.83	139.1	123.357	69.9703	25.1355	79.2735	1515	60	50	32	Yes	Yes	Yes	Yes
809	1	501.42	T1	90.5836	42	2	53	Female	157	50	20.2848	No	Yes	Yes	Yes	0.1	No	78	124	82	4	10.4	135	7.9	1.4	35	3.47	48	150	4	137.5	141.532	70.856	57.2316	68.4459	5086	54	43	44	Yes	No	Yes	Yes
2174	0	501.663	T1	86.8112	44.7	2	53	Male	169	53	18.5568	Yes	No	No	No	0.99	No	89	118	89	3	6.6	120	4.1	1.9	35.2	6.35	81	404	4.31	142.3	127.224	74.3988	30.1626	80.8203	6282	67	54	40	No	Yes	Yes	No
2051	0	503.012	T1	92.6278	46.95	2	45	Male	162	51	19.433	Yes	No	No	No	3	No	117	111	84	3	6.4	128.2	3.83	1.79	38	7.71	83	673	3.62	137.7	127.998	77.0559	36.7365	68.0592	2159	63	58	17	Yes	No	Yes	Yes
1005	0	517.203	T1	104.19	42.3	5	33	Male	162	80	30.4832	Yes	No	No	Yes	0.7	No	132	116	73	4	15.24	111.1	12.08	2.06	32	2.96	70	261	4.25	134.5	93.5814	69.0846	20.4951	57.6183	4603	76	65	29	No	No	Yes	No
33	1	519.847	T1	91.1989	49.9	2	20	Male	175	61	19.9184	No	No	No	No	0.3	No	88	110	87	3	11.62	155.7	7.03	2.7	36.4	5.21	80	780	3.73	133.6	110.596	77.0559	21.6552	73.8597	12463	72	63	26	Yes	Yes	Yes	Yes
16	1	520.908	T1	86.1679	35.05	7	56	Female	153	46	19.6506	No	No	No	No	2	No	73	87	63	1	11.87	122	11.14	0.41	33	12.99	84	741	3.32	129.8	119.49	94.7699	21.6552	80.8203	6481	73	61	33	No	No	No	No
832	0	521.96	T1	117.075	49.9	3	59	Male	162	70	26.6728	No	No	No	No	6	No	98	98	69	4	8.79	131.4	7.21	0.9	45.4	10.97	93	614	4.18	139.5	142.692	52.2563	30.5493	88.1676	10330	80	68	29	Yes	No	Yes	No
124	1	523.224	T1	100.23	46.6	2	66	Female	145	45	21.4031	No	No	No	No	1	No	98	112	88	3	8.17	119.7	6.05	1.22	40.5	7.2	61	461	4.5	138.2	142.692	81.4844	40.6035	77.7267	14689	75	59	40	No	No	Yes	Yes
814	0	524.42	T1	89.1141	43.65	3	62	Male	165	62	22.7732	Yes	Yes	Yes	No	1	No	132	105	83	4	10.83	166.1	7.5	2.43	31.5	8.44	102	424	4.76	137.7	170.535	49.5992	25.9089	134.185	7039	62	55	23	Yes	Yes	Yes	Yes
241	0	525.175	T1	99.7405	48.5863	1	48	Male	168	63	22.3214	Yes	No	No	No	0.2	No	82	91	56	2	8.03	135	5.20206	1.87726	39.2	7	92	453	4.18	140.2	165.121	50.4849	75.7932	83.9139	9074	94	81	28	Yes	Yes	Yes	Yes
641	0	525.443	T1	90.0162	42.7	4	43	Female	153	53	22.6409	No	Yes	No	No	14	Yes	58	92	71	4	5.55	104	2.59	2.18	31.8	9.2	109	591	3.73	134.3	136.505	72.6274	22.8153	96.675	5328	82	69	31	Yes	No	Yes	Yes
603	1	532.245	T1	98.3932	41.2	5	67	Male	162	60	22.8624	No	Yes	No	No	0.6	No	62	102	82	4	3.97	158.7	2.77	0.72	37.6	26.69	273	847	5.41	127.7	135.345	65.5418	34.803	99.3819	21449	69	59	30	No	No	Yes	Yes
261	0	533.889	T1	93.9631	45.5	2	69	Female	150	45	20	No	No	No	No	1	No	86	85	58	2	5.44	115	2.99	1.52	37.9	4.13	55	356	3.95	139.4	167.441	70.856	41.7636	114.463	752.5	66	55	28	Yes	Yes	Yes	Yes
1372	0	538.39	T1	112.745	54.75	1	63	Female	152	60	25.9695	No	Yes	No	No	10	Yes	99	95	62	3	6.78	90.3	3.73	2.37	42.9	5.51	47	210	5.09	109.4	142.692	62.8847	63.4188	67.6725	1716	67	61	19	Yes	No	Yes	Yes
1644	0	539.91	T1	115.512	61.25	1	62	Female	148	43	19.6311	No	Yes	Yes	No	0.4	No	102	111	94	3	4.98	135.6	2.63	1.67	52.9	5.94	90	464	3.74	137.5	150.813	83.2558	75.0198	75.4065	3242	51	41	25	Yes	Yes	Yes	No
39	1	544.274	T1	84.629	41.1	3	65	Female	155	40	16.6493	No	Yes	Yes	No	13	No	104	106	85	4	7.75	142.4	5.92	1.08	35.7	12.43	151	703	5.7	127.4	147.719	92.1128	29.7759	103.249	35000	73	64	28	Yes	Yes	Yes	Yes
249	1	549.208	T1	124.874	54.45	3	18	Male	165	85	31.2213	Yes	No	No	No	0.6	No	122	110	88	4	7	138.5	4.45	1.89	45	6	84	657	3.32	139.3	94.7415	68.1989	19.7217	74.6331	2625	87	76	24	Yes	No	Yes	Yes
435	0	554.795	T1	109.118	44.9	3	56	Female	153	66	28.1943	No	No	No	No	5	No	108	118	66	4	7.63	140.9	5.53	1.46	37.6	5.02	74	595	4.92	140	117.17	71.7417	17.7882	87.3942	9621	70	63	21	Yes	Yes	Yes	Yes
141	1	559.24	T1	99.2072	53.15	2	38	Female	151	51	22.3674	No	No	No	No	0.2	No	98	104	86	4	8.12	141.4	4.34	2.95	38.4	7.95	93	913	3.65	135.9	134.572	81.4844	32.0961	88.941	9830	61	53	28	Yes	Yes	Yes	Yes
491	0	560.152	T1	96.2236	42.15	2	73	Male	160	60	23.4375	No	No	No	No	2	No	68	140	50	3	6.33	123.2	2.98	1.35	35.4	8.65	148	650	4.21	141.2	159.707	58.4562	39.4434	109.049	6138	83	68	36	Yes	Yes	Yes	No
292	1	561.806	T1	99.4869	47.5	2	55	Male	175	70	22.8571	Yes	Yes	Yes	No	10	No	86	106	87	3	6.88	149.6	3.95	1.84	38.3	8.79	74	478	3.91	139.9	124.131	64.6561	37.5099	69.2193	5932	72	63	26	Yes	Yes	Yes	Yes
802	0	564.714	T1	93.0328	41.25	4	68	Male	162	60	22.8624	Yes	No	No	No	0.1	No	133	126	99	4	4.77	132.1	2.58	1.45	34	7.17	90	451	4.26	140.4	177.109	53.142	35.1897	131.478	7398	77	66	30	Yes	Yes	Yes	No
1816	0	567.121	T1	96.4654	43.9	2	59	Female	157	53	21.5019	No	No	No	Yes	1	No	85	151	110	3	6.9	133.1	4.85	1.3	37.4	6.02	100	400	3.82	136	147.333	72.6274	37.5099	81.5937	22232	58	49	32	Yes	Yes	Yes	No
1430	0	569.557	T1	102.895	45.85	2	45	Male	163	67	25.2174	No	No	No	No	0.2	No	89	100	58	3	5.53	119	2.88	1.63	37.7	6.12	91	564	4.15	137.2	112.916	75.2845	29.0025	68.8326	4063	75	65	28	Yes	Yes	Yes	Yes
103	1	576.729	T1	94.7714	44.65	3	83	Male	165	55	20.202	Yes	No	No	No	4	No	87	110	50	4	3.46	110.1	1.75	1.23	38.5	20.87	166	646	4.7	138.9	137.665	76.1702	39.0567	76.1799	7165	65	56	29	Yes	Yes	Yes	Yes
245	1	582.716	T1	93.0698	46.5	1	51	Female	160	51	19.9219	No	Yes	No	No	1	No	86	106	73	3	6.18	138.1	3.59	1.9	37	7.62	88	326	4.33	138.8	161.254	70.856	43.6971	104.796	22484	57	52	21	Yes	No	Yes	Yes
251	1	583.209	T1	105.987	52.6	0	59	Male	162	60	22.8624	Yes	No	No	No	1	No	109	97	76	4	8.49	135.9	5.68	1.98	42.7	9.23	102	521	4.5	135.4	199.537	48.7135	40.6035	128.384	18252	72	67	14	Yes	Yes	Yes	Yes
1416	1	585.818	T1	91.8042	45.85	1	49	Female	160	51.5	20.1172	No	No	No	No	0.8	No	89	97	57	3	4.74	122.6	2.38	1.99	35.9	7.32	76	369	4.08	139.8	168.988	67.3132	49.1109	105.569	5276	80	64	39	Yes	No	Yes	Yes
703	1	586.689	T1	96.9556	152.05	1	81	Male	155	53	22.0604	Yes	No	No	No	0.1	No	85	117	71	4	29.77	114.7	4.78	22.91	37.5	10.56	129	572	4.64	134.2	156.227	70.856	44.8572	94.7415	2719	64	51	41	No	Yes	Yes	Yes
1734	0	590.017	T1	97.5485	47.2	1	52	Female	155	51.5	21.436	No	Yes	No	No	1	No	116	125	85	4	10.16	118.5	7.7	1.78	38.3	4.41	89	543	3.42	137.2	172.468	66.4275	36.7365	110.596	8495	65	56	27	Yes	Yes	Yes	Yes
1040	1	590.402	T1	100.583	43.15	3	53	Male	161	65	25.0762	Yes	Yes	Yes	No	5	No	66	112	78	4	6.88	136.5	4.65	1.37	36.3	8.26	129	646	2.48	141	131.478	69.0846	18.1749	87.0075	2146	65	53	39	Yes	Yes	Yes	Yes
9	1	595.827	T1	86.7779	32.15	9	69	Male	172	70	23.6614	Yes	No	Yes	Yes	3	No	106	124	56	4	9.36	102.1	7.99	0.67	28.8	9.97	86	128	5.04	141.7	126.451	67.3132	22.8153	88.5543	5596	73	60	37	Yes	Yes	Yes	Yes
2151	0	596.546	T1	86.444	43.2	2	73	Female	145	35	16.6468	No	No	No	No	0.1	No	68	113	90	3	7.6	139	5.2	1.2	37.2	7.45	75	384	3.47	139	145.786	116.912	17.4015	94.3548	11895	53	48	19	Yes	Yes	Yes	Yes
705	1	597.272	T1	98.3707	56.35	1	60	Female	150	46	20.4444	No	No	No	No	5	No	90	102	74	2	5.66	139	1.76	3.21	40.3	6.63	87	407	3.56	143.1	172.468	75.2845	49.4976	91.2612	12874	90	86	9.3	Yes	Yes	Yes	Yes
199	0	599.904	T1	100.345	50.85	2	63	Female	152	47.7	20.6458	No	No	No	No	3	No	68	126	68	4	4.49	124.4	2	1.91	41.3	4.63	68	274	3.72	141.1	118.33	106.284	39.0567	56.8449	2538	63	55	24	Yes	Yes	Yes	Yes
633	0	601.877	T1	93.9512	47.55	2	72	Male	170	55	19.0311	Yes	No	Yes	No	10	No	92	107	54	2	8.32	123.8	5.89	1.63	39.4	5.11	97	457	3.62	140	138.825	78.8273	53.3646	72.3129	5920	74	59	36	Yes	Yes	Yes	Yes
918	1	603.246	T1	105.741	42.6	5	61	Male	160	64.5	25.1953	No	Yes	No	Yes	0.6	No	109	121	88	4	12.15	147.6	10.45	0.6	39.6	28.84	330	977	5.48	134.3	127.224	73.5131	34.0296	73.8597	35000	59	54	19.2	Yes	Yes	Yes	No
498	0	604.842	T1	85.614	41.2	3	69	Male	168	56	19.8413	Yes	No	No	No	1	No	81	143	68	3	5.65	126.4	2.97	1.68	32.8	4.77	91	565	4.23	139.4	143.466	75.2845	33.6429	88.5543	13845	59	51	29	Yes	Yes	Yes	Yes
993	0	605.897	T1	90.1959	42	3	54	Male	160	56	21.875	Yes	No	Yes	No	0.1	No	71	118	69	1	6.68	142	4.3	1.74	33.3	5.39	97	364	4.65	137.8	150.813	71.7417	37.1232	93.9681	2228	67	60	22	Yes	Yes	No	Yes
1667	1	611.411	T1	100.001	49	2	65	Male	170	70	24.2215	No	No	No	No	0.1	No	86	123	73	3	6.61	138.7	3.59	2.4	37	7.56	104	463	4.2	139	120.264	72.6274	39.0567	63.4188	2548	71	53	44	Yes	Yes	Yes	Yes
1095	0	611.42	T1	102.238	50.55	0	65	Female	142	44	21.8211	No	No	No	No	3	No	100	133	85	4	9.13	126.6	6.5	1.83	41.4	4.15	63	318	3.54	136.4	186.776	74.3988	54.5247	105.956	1798	65	54	35	Yes	Yes	Yes	Yes
58	1	611.692	T1	104.053	46.45	3	59	Female	142	45	22.317	No	Yes	No	No	2	No	93	96	68	3	6.37	149	4.65	0.89	42	6.67	87	431	4.62	132.1	174.402	77.9416	32.0961	111.37	5489	62	49	42	Yes	Yes	Yes	Yes
56	1	615.649	T1	105.672	46.2	2	35	Male	154	60.5	25.5102	Yes	No	Yes	No	1	No	44	97	64	3	10.33	142.7	7.61	1.44	39	23.65	189	519	5.31	124.7	157.387	64.6561	59.5518	70.3794	5010	70	57	38	Yes	No	Yes	Yes
1169	0	617.75	T1	93.2264	50.95	4	52	Male	160	61	23.8281	Yes	No	No	No	4	No	94	103	80	2	7.5	151	3.08	3.61	32.9	6.74	82	615	3.6	136.9	129.931	77.9416	22.0419	97.0617	3839	81	69	30	Yes	Yes	Yes	Yes
1351	0	619.328	T1	111.96	60.9	2	65	Female	169	64	22.4082	No	Yes	No	No	0.1	No	70	130	74	2	6.48	162	2.54	2.98	46	3.29	84	476	4.03	142.7	107.116	90.3414	45.6306	39.4434	1880	67	53	42	Yes	Yes	Yes	Yes
906	0	622.28	T1	98.2415	47.7	3	63	Male	154	45	18.9745	No	No	No	No	0.1	Yes	97	120	70	3	5.28	149.6	3.78	1.1	42.2	12.63	110	544	5.61	132.9	164.347	84.1415	41.7636	104.022	3644	71	62	25	Yes	Yes	Yes	Yes
2033	0	624.055	T1	96.2085	44.1	2	49	Male	170	62	21.4533	No	No	No	No	0.6	No	69	105	88	4	8.35	150.1	6.37	1.24	37.9	7.41	109	391	3.73	135	143.852	69.9703	35.5764	89.3277	4241	71	65	20	Yes	Yes	Yes	Yes
880	0	634.687	T1	104.279	46.15	3	60	Male	173	75	25.0593	Yes	Yes	No	No	0.1	No	75	89	57	3	4.76	135	2.71	1.47	38.8	8.57	106	623	3.45	140.9	134.572	62.8847	33.2562	86.6208	3870	61	50	36	Yes	Yes	Yes	Yes
167	1	635.242	T1	90.524	47.9	1	52	Male	166	56	20.3223	No	Yes	No	No	0.7	No	114	114	76	3	5.96	134.3	2.87	2.48	35.5	8.71	102	567	4.04	142.2	142.306	79.713	36.7365	81.5937	3556	79	67	32	Yes	Yes	Yes	Yes
548	0	637.96	T1	100.084	52	3	37	Male	166	68	24.677	Yes	Yes	No	No	0.1	No	102	108	81	3	9.19	141	5.04	3.1	36.5	6.75	96	679	4.58	139	98.9952	94.7699	24.7488	52.2045	1536	58	54	18	Yes	Yes	Yes	Yes
1268	0	638.749	T1	107.299	52.3	2	51	Female	155	62	25.8065	No	No	No	Yes	0.2	No	115	101	74	4	6.1	108	2.9	2.6	39.3	5.45	72	425	3.52	138.9	123.744	83.2558	46.7907	61.4853	10544	79	65	31	Yes	Yes	Yes	Yes
1111	0	644.27	T1	90.6142	41.7	2	71	Male	175	62	20.2449	No	No	No	No	4	No	77	123	59	3	6.66	148.3	4.76	1.22	35.6	5.83	98	551	4.27	139.9	158.547	65.5418	38.2833	105.182	1677	63	50	42	Yes	No	Yes	Yes
563	0	646.29	T1	89.3057	39.85	5	61	Female	155	52	21.6441	No	No	Yes	No	2	No	113	100	73	4	12.73	111.1	10.77	1.47	32.5	3.12	76	304	3.28	135.5	125.291	99.1984	28.6158	68.0592	7306	63	55	28	Yes	Yes	Yes	Yes
251	0	646.678	T1	105.958	46.75	2	68	Female	153	63	26.9127	No	Yes	Yes	No	0.9	No	72	128	77	2	8.47	130	5.59	1.93	37.1	9.31	133	819	3.67	134.4	128.771	79.713	44.0838	73.0863	7663	63	49	44	Yes	No	Yes	Yes
1926	1	649.282	T1	99.7194	58.6	1	66	Male	164	52	19.3337	No	No	No	No	0.1	No	39	108	58	1	8.74	134.8	4.69	3.14	42.9	6.22	79	274	4.32	139.7	143.852	86.7986	61.0986	63.0321	1502	75	61	37	No	Yes	Yes	No
114	0	651.235	T1	101.547	46.55	3	59	Male	170	68	23.5294	Yes	Yes	No	No	7	No	102	102	69	4	8.57	128.3	6.05	1.53	38.9	14.13	165	763	3.86	134.4	131.865	72.6274	16.6281	102.475	7376	83	72	27	Yes	Yes	Yes	Yes
1808	0	657.778	T1	106.422	46.2	4	35	Male	168	70	24.8016	Yes	No	No	No	3	Yes	73	103	73	1	8.62	151.1	6.63	1.12	40.6	5.25	89	562	3.26	138.2	139.599	67.3132	37.5099	80.8203	453.5	65	51	43	Yes	Yes	Yes	No
1561	0	661.366	T1	93.4155	42.8	3	81	Male	172	68	22.9854	Yes	No	Yes	No	0.1	No	102	124	88	4	8.22	142.4	4.89	1.74	34.1	9.53	128	550	4.5	135.3	150.426	64.6561	35.1897	70.3794	3294	67	55	37	Yes	Yes	Yes	Yes
1930	0	666.875	T1	100.709	53.95	1	69	Male	153	51	21.7865	No	No	No	No	0.3	No	72	98	74	2	6.35	147	2.4	2.73	40.3	8.55	97	491	3.98	136	146.173	89.4557	37.1232	80.8203	2310	65	57	26	Yes	Yes	Yes	No
2281	0	668.41	T1	87.6696	47.85	1	45	Female	155	45	18.7305	No	No	No	No	0.2	No	86	126	90	3	5.5	120	2.41	2.55	35.1	7.75	105	453	3.67	143.4	161.254	92.1128	28.2291	114.077	6481	58	46	44	No	No	Yes	Yes
732	0	668.451	T1	84.8023	34.7	6	68	Male	172	64	21.6333	No	No	No	No	4	No	87	103	66	4	7.9	117	5.98	0.94	30	14.79	240	592	4.23	134.9	124.131	84.1415	22.0419	75.4065	15079	73	64	27	Yes	No	Yes	Yes
941	0	668.622	T1	101.378	48.65	2	59	Male	168	63	22.3214	Yes	Yes	Yes	No	0.1	No	61	148	98	4	10.03	123.9	7.46	1.67	40.3	5.56	106	584	4.14	140.8	121.037	87.6843	22.0419	86.6208	11219	70	58	35	Yes	Yes	Yes	Yes
722	0	671.425	T1	82.426	40.5	4	36	Male	168	55	19.487	No	No	No	No	0.1	No	105	136	105	3	6.35	124.8	3.29	1.88	31.1	13.98	345	556	4.22	141.5	126.451	96.5413	31.7094	65.3523	22804	63	50	40	Yes	No	Yes	Yes
994	1	671.903	T1	102.092	45	2	81	Male	166	67	24.3141	Yes	No	No	No	10	Yes	100	150	91	4	7	150.5	4.68	1.34	38.3	10.76	140	731	4.92	143.3	141.532	70.856	37.1232	80.0469	8381	57	48	33	Yes	Yes	Yes	Yes
480	0	673.218	T1	95.9989	43.15	3	28	Male	168	70	24.8016	Yes	No	No	No	0.1	No	70	104	67	3	9.11	155.1	6.36	1.91	33.6	5.89	101	763	3.76	140.8	150.813	63.7704	31.7094	100.929	7002	68	61	23	No	Yes	Yes	Yes
767	1	677.493	T1	93.5428	43.35	4	34	Male	163	60	22.5827	No	No	No	Yes	0.1	No	62	136	68	3	15.73	165.8	12.74	1.73	34.7	16.59	142	462	4.49	129.8	122.584	92.1128	22.8153	63.4188	35000	69	59	30	Yes	Yes	Yes	Yes
96	0	679.252	T1	82.0154	41.35	3	55	Male	170	48	16.609	Yes	No	No	No	4	No	64	89	57	4	5.39	136.9	3.3	1.39	34.4	6.06	97	450	4.33	134.9	202.244	69.9703	55.2981	131.091	9811	69	62	24	Yes	No	Yes	Yes
663	1	680.893	T1	90.3542	40.85	3	68	Male	169	58	20.3074	Yes	No	Yes	No	0.1	No	82	98	61	3	3.82	101.7	2.01	1.09	35.4	7.74	99	269	3.84	139.7	161.641	72.6274	31.7094	103.636	6481	58	47	37	No	Yes	Yes	Yes
33	1	682.106	T1	114.078	54.05	1	55	Male	170	75	25.9516	No	Yes	No	No	1	No	109	104	82	4	6.78	133.4	4.06	1.95	44.3	8.44	106	539	3.85	138	144.626	62.8847	28.6158	98.2218	11207	88	75	25	Yes	No	Yes	Yes
594	0	686.382	T1	87.0883	39.4	4	52	Male	160	55	21.4844	No	Yes	No	Yes	7	No	88	97	75	3	10.3	128	7.63	1.54	31.7	4.72	101	600	4.85	135.1	169.761	73.5131	27.8424	125.678	1733	79	65	34	Yes	Yes	Yes	No
645	1	687.192	T1	91.3594	49	1	61	Male	171	60	20.5191	Yes	No	Yes	No	1	No	71	99	77	4	10.59	124.3	6.57	2.64	35.8	4.39	106	642	3.86	136.4	161.641	70.856	31.3227	117.557	9710	65	51	43	Yes	Yes	Yes	Yes
7	1	690.117	T1	101.343	48.3	2	76	Female	152	46	19.91	No	Yes	No	No	5	No	71	102	45	4	11.16	110.4	8.86	1.08	42.9	17.15	120	684	3.98	131.1	182.136	82.3701	46.0173	110.21	12823	65	55	32	No	Yes	Yes	No
392	0	690.84	T1	106.189	52.3	2	54	Male	171	70	23.939	No	Yes	Yes	No	4	No	70	177	140	4	6.5	140.6	3.85	2.16	41.5	8	114	702	4.17	141.6	131.091	75.2845	29.3892	85.074	13520	75	67	23	Yes	Yes	Yes	Yes
2207	0	693.966	T1	112.021	52.35	2	54	Female	155	61	25.3902	No	No	No	No	1	No	74	120	62	2	7.46	135.6	4.86	1.87	43	4.75	77	415	4.24	141.1	133.798	85.0272	47.9508	63.8055	760.3	62	55	24	Yes	Yes	Yes	Yes
757	0	700.098	T1	83.2428	36.95	5	71	Female	142	36	17.8536	No	No	No	No	1	No	71	120	66	3	6.63	124	5.26	0.67	33.6	25.9	204	641	6.13	130.7	258.316	75.2845	36.7365	189.87	35000	53	45	32	Yes	Yes	Yes	Yes
961	0	700.468	T1	108.433	50.55	2	61	Male	160	60	23.4375	No	No	No	No	5	No	92	126	88	4	6.99	139.3	4.79	1.39	43.6	4.02	111	652	4.11	136.5	168.988	69.0846	54.5247	95.1282	16184	68	62	20	Yes	Yes	Yes	Yes
999	0	700.823	T1	108.042	61.55	1	55	Male	173	64.5	21.551	Yes	No	No	No	0.1	No	72	100	62	2	8.61	173	4.38	3.17	45.7	6.9	64	359	4.05	136.8	159.32	68.1989	50.6577	87.0075	461.2	62	54	44	Yes	Yes	No	No
717	0	701.442	T2	98.4382	52.5	1	66	Male	163	54	20.3244	Yes	Yes	No	No	2	No	58	89	48	3	8.12	137.1	5	2.34	40.8	10.98	96	509	4.46	133	170.535	76.1702	34.803	116.01	5926	75	64	30	Yes	Yes	Yes	Yes
957	1	702.348	T2	92.0393	39.55	4	61	Male	170	62	21.4533	No	Yes	No	No	3	No	77	97	63	3	4.84	150.4	3.32	0.89	35.1	8.2	133	256	4.11	136	121.811	92.9985	42.9237	59.5518	10688	70	59	31	Yes	Yes	Yes	No
1908	1	705.824	T2	108.213	52.7	2	66	Male	160	56	21.875	Yes	No	No	No	2	No	82	104	76	3	6.98	168	3.99	1.46	45.4	10.53	85	543	4.15	138.7	142.306	88.57	40.9902	75.7932	639.4	64	53	35	Yes	Yes	Yes	Yes
6	1	706.455	T2	101.871	48.1	1	55	Male	159	59	23.3377	No	No	No	No	0.6	No	62	112	73	4	4.62	164.8	2.32	1.76	39.3	9.05	117	864	4.17	135.4	146.946	81.4844	25.9089	104.796	8780	73	64	25	No	No	Yes	Yes
303	0	707.471	T2	115.18	61.2	1	61	Male	168	72	25.5102	Yes	No	Yes	Yes	0.1	No	70	110	62	3	9.05	145.3	4.94	3.12	45.6	5.94	93	401	3.74	142.5	151.973	64.6561	37.5099	98.6085	11942	70	61	27	Yes	Yes	Yes	Yes
276	0	708.975	T2	95.9832	49.7	0	62	Male	165	50	18.3655	No	No	No	No	0.1	No	105	90	57	3	6.71	134.9	4.23	1.62	41.6	8.22	91	168	4.99	140	232.02	61.1133	64.5789	149.266	2026	87	75	28	Yes	Yes	Yes	Yes
464	0	712.552	T2	103.841	55.75	2	35	Male	168	57	20.1956	Yes	No	No	No	0.1	No	99	107	78	4	8.93	126	5.92	2.23	44.6	11.99	68	359	3.79	137.5	124.904	100.084	31.3227	73.8597	1947	59	47	41	Yes	Yes	Yes	Yes
1077	1	713.02	T2	104.35	51.95	1	47	Male	175	79	25.7959	Yes	No	Yes	No	3	No	80	124	91	4	6.49	138.8	2.82	2.81	37.9	6.88	93	434	3.68	142.6	141.532	63.7704	22.0419	97.4484	8620	77	62	40	No	Yes	Yes	Yes
492	0	716.373	T2	105.133	48.15	2	66	Male	165	70	25.7117	Yes	No	Yes	No	0.1	No	101	123	106	2	7.33	143.8	3.6	1.91	38.6	4.12	77	540	3.7	142.5	128.384	79.713	33.2562	67.2858	2895	63	51	37	Yes	Yes	Yes	Yes
609	0	716.404	T2	103.787	56.2	1	72	Male	173	61	20.3816	No	No	Yes	No	3	No	96	129	58	2	8.03	143	4.75	2.38	44.3	5.87	88	568	4.6	140.7	147.333	79.713	32.4828	95.1282	10415	77	70	20	Yes	Yes	Yes	Yes
683	1	717.574	T2	90.3	49.1	0	49	Female	150	44	19.5556	No	No	No	No	2	No	62	116	98	3	7.36	130.4	3.76	2.62	36	5.43	73	223	3.62	138	197.99	82.3701	53.7513	114.85	16898	77	69	21	Yes	Yes	Yes	Yes
14	1	718.428	T2	80.2637	44.4	3	28	Female	160	46	17.9688	No	No	No	No	1	No	76	83	62	4	8	134	4.7	2.7	30.9	6.46	83	635	4.1	131.2	154.68	100.97	13.5345	131.091	2916	61	55	20	Yes	Yes	Yes	Yes
1996	0	718.637	T2	105.929	49	1	45	Female	158	58	23.2335	No	No	No	No	0.6	No	71	107	58	2	6.1	122	4	1.5	41.5	6.11	61	195	3.98	140.5	184.069	67.3132	46.0173	124.131	981	65	48	43	Yes	Yes	Yes	No
674	0	722.286	T2	103.945	48.3	2	67	Male	166	64	23.2254	No	No	Yes	Yes	5	No	55	94	68	2	14.22	144	12.06	1.48	40.9	8.73	108	568	4.18	134.1	153.52	73.5131	30.936	107.116	1453	74	59	41	Yes	Yes	Yes	Yes
87	1	725.728	T2	100.95	48.6	2	53	Male	160	62	24.2188	No	No	Yes	No	0.2	No	77	85	65	3	7.3	128	4.4	2.2	37.6	6.99	110	849	3.96	137.9	137.665	85.0272	25.1355	91.2612	9067	66	52	42	Yes	Yes	Yes	Yes
1399	0	729.328	T2	98.4298	49.85	2	38	Female	160	48	18.75	No	Yes	No	No	5	Yes	86	90	58	3	7.99	131.8	5.96	1.55	42.1	3.89	71	375	3.25	136.8	157.387	96.5413	40.6035	102.862	3182	62	56	20	Yes	Yes	Yes	Yes
75	1	737.637	T2	92.1224	44.6	0	61	Female	157	52	21.0962	No	No	No	No	0.92	No	105	132	87	4	5.98	140	3.29	1.92	35	5.64	79	347	3.2	143.5	192.963	73.5131	43.6971	130.705	14913	66	55	35	Yes	Yes	Yes	Yes
787	0	738.296	T2	105.119	47.55	1	73	Female	145	49	23.3056	No	No	No	No	0.3	No	84	108	65	2	12.16	125	10	1.23	41.4	5.43	62	318	3.78	137.8	180.976	83.2558	39.4434	119.49	4243	58	45	44	Yes	No	Yes	Yes
1792	0	740.573	T2	92.147	44.5	1	47	Male	150	48	21.3333	No	No	No	No	0.1	No	88	100	80	4	6.77	149.7	4.38	1.9	35	5.46	76	274	4.31	141.7	162.801	94.7699	38.67	91.6479	4483	60	45	33	No	Yes	Yes	Yes
2161	0	744	T2	122.128	57.4	2	48	Female	161	73	28.1625	No	Yes	No	No	5	No	80	103	71	4	10.5	122	7.4	2.3	45.9	4.29	67	403	4.75	138.8	126.451	80.5987	42.1503	69.2193	551.3	75	66	26	Yes	Yes	Yes	Yes
980	0	757.112	T2	108.752	52.55	0	60	Female	152	54	23.3726	No	No	No	No	0.4	Yes	100	110	63	3	6.56	93.9	4.06	1.81	43.5	7.87	82	335	3.94	141.7	184.069	76.1702	69.2193	93.1947	3940	80	68	30	Yes	Yes	Yes	No
1226	0	758.295	T2	94.8196	51	1	34	Male	162	60	22.8624	Yes	No	No	No	0.1	No	93	88	59	3	7.22	151	2.97	3.16	35.2	5.51	94	596	4.35	136.4	174.015	72.6274	34.0296	125.678	2069	70	58	35	Yes	Yes	Yes	Yes
489	0	759.419	T2	99.4726	48.65	1	38	Female	160	52	20.3125	No	No	No	No	2	No	75	108	57	3	4.53	115	2.61	1.57	40.8	5.8	40	357	3.69	138.2	206.111	70.856	44.4705	135.345	116.8	64	50	43	Yes	Yes	Yes	No
843	0	765.85	T2	107.378	46.25	3	58	Male	164	67	24.9108	Yes	Yes	Yes	No	1	No	124	118	62	3	6.03	145.3	4.3	1.03	41.1	5.23	92	467	4.43	143.4	157.387	72.6274	37.5099	107.503	3134	70	60	30	Yes	Yes	Yes	Yes
541	1	767.44	T2	102.453	44.45	0	53	Male	150	60	26.6667	No	No	No	No	1	No	99	107	73	3	6.86	129.9	4.32	1.85	35.2	5.18	85	381	4.21	143.9	187.549	68.1989	44.4705	127.224	8503	95	83	28	Yes	Yes	Yes	Yes
313	1	769.652	T2	108.667	57.85	2	51	Male	167	73	26.1752	No	No	No	No	0.4	No	79	94	70	3	8.83	133	4.29	3.49	40.4	8.89	120	618	3.64	137.9	127.998	82.3701	30.936	85.074	3466	78	65	34	Yes	Yes	Yes	Yes
944	0	770.379	T2	95.7194	33	8	42	Female	158	71	28.441	No	No	No	No	0.8	No	102	140	78	3	12.36	138.6	10.14	1	28	5.54	67	516	4.46	134.8	139.212	77.9416	35.1897	85.4607	4645	60	49	37	Yes	Yes	Yes	Yes
810	0	770.872	T2	91.4318	43.4	1	58	Female	150	45	20	No	No	No	No	0.2	No	102	90	61	4	5.09	128.2	3.08	1.44	36.2	6.47	103	501	3.71	143.4	201.471	85.0272	45.2439	134.572	4615	68	61	23	Yes	Yes	Yes	Yes
1145	0	775.875	T2	104.103	48.95	1	50	Male	155	53	22.0604	Yes	No	No	No	2	No	101	125	94	2	6.44	144.7	4.72	1.33	42.3	10.07	136	769	4.2	141.1	192.19	76.1702	46.7907	125.291	4707	74	60	37	Yes	Yes	Yes	No
12	1	782.544	T2	103.759	65.4	1	53	Female	142	40	19.8373	No	No	No	No	5	No	86	95	68	4	9.6	115	4.9	4.1	44.9	9.05	76	559	3.55	135.9	162.414	120.455	49.1109	86.6208	9271	84	70	32	Yes	Yes	Yes	Yes
2281	0	785.724	T2	74.9435	27.3	11	67	Male	172	63	21.2953	Yes	No	Yes	No	4	No	93	105	58	2	4.4	83	3	0.7	23.8	4.35	69	88	2.62	143.1	118.33	105.398	6.5739	31.7094	6481	60	47	44	No	No	Yes	No
1235	0	787.215	T2	102.971	41.35	5	43	Male	176	86	27.7634	Yes	No	No	Yes	0.5	No	108	103	77	3	5.07	149	2.99	1.37	34.5	5.09	93	590	3.3	140.9	124.517	73.5131	37.5099	73.8597	883.2	67	57	22.7	Yes	Yes	Yes	Yes
624	0	789.809	T2	116.082	59	1	39	Male	170	70	24.2215	Yes	No	No	No	1	No	84	108	62	2	7.45	148.7	4.4	2.24	47.8	7.57	99	370	3.76	139.7	161.254	69.9703	41.3769	102.089	801.2	68	58	31	Yes	Yes	Yes	No
724	1	790.739	T2	99.7837	38.1	7	46	Male	170	75	25.9516	No	No	No	No	3	No	103	101	65	4	6.26	132.4	5.18	0.68	34.7	5.09	69	396	3.71	138.3	127.998	82.3701	40.6035	81.5937	8204	91	62	34	Yes	No	Yes	Yes
377	0	794.084	T2	100.194	56.7	0	60	Male	170	58	20.0692	No	Yes	No	No	0.1	No	112	103	63	4	6.98	103.2	3.33	2.88	42.3	12.98	105	512	3.84	135.1	195.67	69.9703	54.9114	122.971	1483	69	57	36	Yes	Yes	Yes	Yes
25	1	800.76	T2	111.251	42.1	4	55	Male	170	88	30.4498	No	No	No	Yes	4	No	77	124	87	4	7.68	113.6	5.82	1.06	36.8	5.1	89	558	3.8	140.9	125.291	72.6274	27.4557	71.9262	5828	73	60	36	Yes	No	Yes	No
9	1	800.941	T2	99.5856	54.65	0	51	Male	170	48	16.609	Yes	No	Yes	No	7	Yes	86	100	60	2	5.87	134.5	3.46	1.69	46.2	5.32	61	422	3.8	137.5	182.909	91.2271	51.8178	113.69	2402	90	77	29	Yes	No	Yes	Yes
213	1	814.251	T2	103.943	40.05	4	56	Male	150	65	28.8889	Yes	Yes	No	Yes	3	No	95	122	76	4	7.38	138.7	5.16	1.33	33.4	3.33	82	450	3.76	130.7	148.88	84.1415	34.0296	94.7415	9144	73	64	26	Yes	No	Yes	Yes
1026	1	816.466	T2	106.118	48.5	2	47	Male	170	80	27.6817	Yes	Yes	No	No	0.5	No	112	116	88	3	7.5	166	4.23	2.34	36.8	7.97	99	967	3.05	140.5	122.584	83.2558	19.7217	86.6208	2439	62	54	27.6	Yes	Yes	Yes	Yes
443	1	823.116	T2	101.088	48.1	1	55	Male	168	68	24.093	Yes	Yes	No	No	7	No	84	89	60	4	11.22	145.9	7.98	2.04	37.9	10.28	80	679	3.53	126.7	166.668	72.6274	16.6281	124.131	9852	88	80	20	Yes	Yes	Yes	No
239	0	823.628	T2	92.1369	47.8765	1	58	Male	160	48	18.75	Yes	No	Yes	No	5	No	73	117	69	4	8.03	135	5.20804	1.8753	38.5	19.1	199	1150	3.97	139.9	162.801	105.398	35.5764	122.197	21934	71	63	25	Yes	Yes	Yes	Yes
373	1	824.239	T2	91.551	44.85	4	50	Male	168	63	22.3214	Yes	No	No	No	3	No	105	119	72	4	8.75	140	5.36	2.23	33.7	6.39	123	673	4.05	138.2	138.052	94.7699	29.3892	90.4878	2575	81	69	25	Yes	Yes	Yes	Yes
629	0	829.58	T2	113.577	47.55	4	46	Male	168	94.5	33.4821	Yes	No	No	No	0.2	No	110	111	84	4	9.11	152.2	5.38	2.59	34.6	9.81	146	594	4.07	141.6	139.599	62.8847	17.7882	97.0617	3544	64	56	26	Yes	Yes	Yes	Yes
1992	0	830.196	T2	87.1654	43.4	3	63	Male	160	51	19.9219	Yes	No	No	No	0.1	No	121	130	80	4	8.45	141.8	5.05	1.94	33.7	11.64	118	480	3.46	140.3	176.722	92.1128	41.7636	107.116	9740	62	52	33	Yes	Yes	Yes	Yes
837	0	830.696	T2	87.411	50.15	0	27	Male	158	47	18.8271	Yes	No	No	No	0.1	No	86	142	102	4	9.93	138.8	6.21	2.99	35.2	6.35	123	578	4.04	139.9	205.724	85.9129	41.3769	142.306	4391	68	53	44	Yes	Yes	Yes	Yes
694	0	833.262	T2	93.3689	40.1	4	55	Male	158	60	24.0346	Yes	No	No	No	0.1	No	40	97	55	3	4.17	151	2.22	1.48	32.7	9.5	92	405	4.32	135	168.601	82.3701	46.404	102.475	2165	76	60	42	Yes	Yes	Yes	Yes
1378	0	833.709	T2	100.755	42.65	2	60	Male	163	65	24.4646	No	No	No	No	0.3	Yes	40	150	88	4	6.39	133.9	4.74	1.09	37.2	12.4	156	642	4.1	141.1	198.377	64.6561	99.3819	72.6996	33332	64	55	24	Yes	No	Yes	No
804	1	835.22	T2	96.3764	41.35	3	76	Male	163	61.5	23.1473	No	No	Yes	No	0.2	No	76	126	81	3	6.11	108.5	4.48	1.09	35.9	10.68	110	370	6.97	139.8	166.668	81.4844	48.3375	90.4878	10693	68	54	41	Yes	Yes	Yes	Yes
859	0	836.254	T2	96.761	49.75	3	61	Female	152	55	23.8054	No	Yes	No	No	0.7	No	164	91	77	2	6.86	102.3	2.89	2.97	34.9	5.06	78	420	4.5	140	166.668	91.2271	28.2291	118.33	9246	57	46	38	Yes	Yes	Yes	Yes
1389	0	838.646	T2	88.2098	41.05	2	71	Female	147	40	18.5108	No	No	No	No	1	No	96	126	76	4	5.7	115.1	4.22	1.01	36	8.46	58	309	3.89	141.8	225.446	92.9985	77.7267	132.638	35000	73	61	34	Yes	Yes	Yes	Yes
1039	0	839.819	T2	104.705	52.1	2	75	Female	155	57	23.7253	No	Yes	Yes	No	0.2	No	60	118	96	3	10.26	124	6.64	2.38	40.2	6.41	111	540	3.9	141.5	121.424	121.341	24.3621	71.9262	487.2	70	56	40	No	Yes	Yes	Yes
981	1	842.263	T2	93.9988	45.4	4	36	Male	170	69	23.8754	No	Yes	No	No	0.1	No	111	84	59	2	8.4	136	5	2.4	33.4	8.26	132	862	3.39	131.8	127.611	95.6556	21.2685	83.1405	9403	66	54	37	Yes	No	Yes	Yes
78	1	851.732	T2	91.8722	45.7	2	65	Male	171	54	18.4672	Yes	No	Yes	No	3	No	144	107	76	3	5.23	156	3.19	1.4	38.7	7.5	100	463	3.93	132.9	153.52	102.741	34.4163	86.6208	2966	79	68	28	Yes	Yes	Yes	Yes
4	1	851.788	T2	79.5383	35.5	5	60	Male	160	45	17.5781	Yes	Yes	No	No	7	No	88	121	81	3	9.05	131.4	7.27	0.8	31.5	20.07	224	583	4.42	140.5	175.175	108.055	38.67	97.4484	35000	76	64	31	Yes	Yes	Yes	Yes
641	0	852.115	T2	100.019	43.8	3	75	Female	145	55	26.1593	No	Yes	No	No	3	No	62	111	53	3	6.35	114	3.66	1.88	34.4	8.07	74	492	3.97	137.8	160.481	96.5413	39.4434	88.5543	739.9	62	51	36	Yes	Yes	No	No
40	1	863.964	T2	96.1531	39.45	4	50	Male	170	77	26.6436	No	No	No	No	3	No	82	86	52	3	17.73	122	14.25	1.61	31.4	14.4	118	836	3.79	125.9	105.569	106.284	24.3621	65.3523	15413	69	57	34	Yes	No	Yes	Yes
33	1	865.071	T2	85.635	46.95	1	27	Male	170	49	16.955	Yes	No	No	No	0.4	No	96	80	66	4	8.47	144.4	5.68	2.11	36.4	4.26	67	398	3.51	138	140.372	125.769	26.2956	90.8745	6544	82	73	22	Yes	No	Yes	Yes
12	1	868.495	T2	100.652	53.1	0	74	Female	158	45	18.026	No	No	No	No	5	No	69	88	47	4	5.78	137.9	3.47	1.7	44.6	11.24	77	438	3.45	138.7	222.353	86.7986	57.2316	149.653	2844	68	56	36	Yes	No	Yes	Yes
1373	0	869.863	T2	106.207	48.4	1	68	Male	160	63.5	24.8047	Yes	No	No	No	2	No	96	147	87	4	6.81	116.1	4.69	1.6	40.4	11.73	229	630	3.32	132.6	156.227	87.6843	35.1897	110.983	35000	69	54	42	Yes	Yes	Yes	Yes
1449	0	870.151	T2	90.2779	47.05	1	64	Male	166	47	17.0562	No	No	No	No	6	No	76	101	72	2	6.35	124.2	4.04	1.53	39.4	6.01	84	491	4.24	138.9	220.032	84.1415	65.3523	146.173	1895	74	65	27	Yes	Yes	Yes	No
182	1	873.748	T2	105.272	50.05	2	16	Male	175	68	22.2041	Yes	No	No	No	0.1	No	100	96	65	4	6.88	161.4	4.48	1.41	43	3.59	102	447	3.92	141.1	174.788	73.5131	47.5641	125.678	8611	73	66	21	Yes	No	Yes	Yes
697	1	875.285	T2	105.081	46.4	1	53	Male	171	76	25.9909	No	No	No	No	5	No	99	104	70	4	9.29	163.9	6.69	1.64	38.2	7.97	124	568	3.38	140.6	151.2	76.1702	32.0961	101.702	9697	80	67	33	Yes	Yes	Yes	Yes
1093	0	878.365	T2	115.001	54.85	1	58	Male	167	72	25.8166	Yes	No	Yes	No	0.4	No	68	127	76	3	7.12	139	4.26	1.95	45.1	5.42	79	520	4.68	145	148.106	82.3701	41.7636	88.5543	2395	68	52	44	Yes	No	Yes	Yes
265	1	882.26	T2	77.0615	28.15	10	53	Male	163	59	22.2063	No	No	No	No	3	No	107	142	92	4	14.58	125.9	12.83	0.81	24.1	14.77	108	413	3.75	132	114.077	131.084	23.9754	66.5124	23147	71	57	39	Yes	Yes	Yes	Yes
1777	0	885.042	T2	93.9045	43.2	3	58	Male	160	49	19.1406	Yes	Yes	No	No	2	No	118	112	88	3	4.4	130	3.2	0.8	39.2	6.39	81	593	3.96	137.2	159.32	113.37	36.3498	85.8474	6429	66	59	24	Yes	Yes	Yes	Yes
636	0	885.865	T2	98.1758	42.6	5	63	Male	171	63	21.5451	No	No	No	No	2	No	105	95	73	3	5.07	114.4	3.85	0.7	39.1	8.07	102	324	4.35	140.9	138.052	101.855	20.8818	87.7809	8471	62	56	24	Yes	Yes	Yes	Yes
1784	0	886.873	T2	94.9382	50.75	1	62	Female	148	36	16.4354	No	Yes	No	No	0.2	No	65	104	60	4	5.43	106.8	3.5	1.53	43.1	8.31	54	282	3.56	137.8	250.582	98.3127	64.1922	165.508	2620	83	70	32	Yes	Yes	Yes	Yes
281	0	887.008	T2	101.764	49.45	0	33	Male	170	63	21.7993	Yes	No	No	No	2	No	114	108	74	3	8.19	169.9	5.74	1.65	41.2	7.87	81	328	4.42	139.1	184.843	76.1702	52.2045	119.104	4551	77	66	27	Yes	Yes	Yes	Yes
2288	0	892.89	T2	112.514	53.75	2	61	Male	167	64	22.9481	Yes	No	No	No	14	No	92	109	64	4	6.15	137.6	3.6	1.35	47	8.58	96	369	4.63	140.9	169.375	82.3701	41.7636	97.8351	603.3	76	59	43	Yes	No	Yes	Yes
1779	0	897.624	T2	112.003	60	2	55	Male	165	65	23.8751	No	No	Yes	No	10	No	86	120	81	4	9.1	139	5	2.9	45.5	11.5	97	675	3.93	135.1	139.212	99.1984	28.6158	90.1011	13412	72	66	19	No	Yes	Yes	Yes
1038	0	900.349	T2	99.3237	51.45	1	61	Male	158	52	20.83	Yes	No	No	No	2	No	107	102	64	2	8.04	125.9	4.46	2.15	40.7	13.22	124	307	4.83	140.5	142.692	121.341	32.0961	88.941	5145	72	63	27	Yes	No	Yes	Yes
254	0	902.039	T2	100.687	45.55	4	43	Male	165	72	26.4463	Yes	Yes	No	No	0.2	No	108	112	88	4	8.82	150.1	5.73	2.17	34.7	6.42	107	796	4.14	133.1	103.249	121.341	21.6552	68.4459	6503	69	62	23	Yes	Yes	Yes	No
706	0	906.461	T2	113.473	45.35	2	44	Male	158	75	30.0433	No	Yes	Yes	No	1	No	83	119	97	3	8.54	151.1	6.36	1.33	38.7	7.26	107	483	3.87	138.1	155.067	77.9416	35.1897	101.702	3203	57	47	36	Yes	Yes	Yes	Yes
450	0	907.223	T2	95.2124	46.15	1	67	Male	168	62	21.9671	Yes	No	Yes	No	9	No	86	140	71	2	4.65	160	2.03	1.91	36.6	4.13	92	532	4.18	136.2	163.574	89.4557	48.3375	93.9681	6481	71	59	33	Yes	Yes	Yes	Yes
914	0	908.043	T2	106.136	50.85	1	47	Male	162	60	22.8624	Yes	No	No	No	0.6	No	94	114	83	3	4.57	151.2	1.99	1.61	42.8	8.37	115	696	4.68	143.4	165.894	91.2271	34.4163	122.584	1579	68	76	24	Yes	Yes	Yes	Yes
455	0	915.503	T2	89.2601	47.85	1	79	Male	168	45	15.9439	No	No	No	No	3	No	92	110	70	3	6.25	140.6	3.85	1.55	40.1	5.83	73	327	4.08	134.5	212.685	95.6556	45.6306	133.412	2345	77	69	23	Yes	Yes	Yes	Yes
745	1	915.767	T2	97.6737	48.9	2	36	Male	170	55	19.0311	Yes	No	No	No	4	No	67	122	88	4	6	134	4.1	1.4	41.9	7.73	95	576	3.34	137.6	172.468	96.5413	27.069	119.49	3718	59	47	43	No	Yes	Yes	No
62	1	916.51	T2	103.669	48.4	1	37	Male	160	60	23.4375	No	No	Yes	No	10	No	120	92	78	4	10.5	153	7.8	1.6	40.4	6.29	103	661	3.55	136	167.441	91.2271	25.9089	104.022	9766	64	50	43	Yes	Yes	Yes	Yes
3	1	917.044	T2	90.1761	41.6	3	46	Male	165	50	18.3655	Yes	Yes	No	No	0.1	No	120	101	59	4	19.51	181.4	17.55	0.78	37.7	9.67	98	670	3.48	148.9	276.104	66.4275	127.224	137.665	18538	78	65	34	Yes	No	Yes	No
223	1	920.356	T2	94.5353	42.2	4	54	Male	176	64	20.6612	No	No	No	No	10	No	101	102	73	4	9.5	150	7.1	0.9	37.7	17.53	215	826	3.88	130.8	134.185	107.17	16.2414	85.4607	30660	78	65	35	Yes	Yes	Yes	No
770	0	920.733	T2	100.835	49.15	2	41	Male	165	65	23.8751	Yes	No	No	Yes	4	No	61	117	76	3	6.71	151.1	3.56	2.23	38	5.6	82	272	4.14	137	131.091	108.055	35.9631	71.9262	420.3	73	63	28	Yes	Yes	Yes	Yes
743	0	924.323	T2	101.519	52.55	0	64	Female	156	48	19.7239	No	No	No	No	1	No	76	94	58	2	5.73	127.5	3.18	1.89	43.1	9.47	69	259	4.32	141.2	194.123	99.1984	62.2587	101.315	1333	65	53	38	Yes	Yes	Yes	Yes
468	1	924.716	T2	92.0426	44.75	2	73	Male	167	50	17.9282	No	Yes	No	Yes	6	No	96	97	74	4	8.23	155.9	6.38	1.05	39.5	28.19	290	1001	4.48	132.9	213.072	86.7986	35.9631	147.719	35000	72	67	17	Yes	No	Yes	Yes
1102	0	927.056	T2	99.5181	46.75	1	77	Male	173	63	21.0498	Yes	No	Yes	No	0.9	No	88	106	78	2	6.82	175.9	4.79	1.23	40.6	8.85	103	628	4.16	137.2	180.589	81.4844	40.6035	133.798	2397	56	47	34	Yes	Yes	Yes	No
2039	0	928.347	T2	79.5301	41.4	2	54	Female	152	37.5	16.231	No	No	No	No	10	No	103	101	66	4	7.4	130	4.8	1.7	32.9	11.34	57	216	3.14	131.7	201.084	123.112	26.6823	135.732	7517	72	60	43	Yes	Yes	Yes	Yes
231	1	944.947	T2	96.7177	41.8	3	67	Male	159	53	20.9644	No	No	No	No	0.4	No	85	130	90	4	9.2	145.1	7.9	0.6	38.8	9.42	164	715	3.32	145	186.389	95.6556	32.8695	132.638	35000	74	65	25	Yes	Yes	Yes	No
963	0	949.487	T2	104.833	54.5	1	54	Male	158	52	20.83	Yes	No	No	No	1	No	91	124	86	4	5.46	114.7	2.9	2.02	44.4	7.25	73	318	3.6	139.9	151.586	120.455	38.67	87.3942	1670	74	64	27	No	Yes	Yes	No
771	1	950.129	T2	95.4287	51.9	0	67	Male	172	61	20.6193	Yes	No	No	No	0.1	No	100	133	80	2	7.1	128	3.6	2.7	38.4	9.29	99	307	4.44	139.7	189.096	82.3701	38.67	143.466	1688	68	58	31	Yes	Yes	Yes	No
353	0	957.028	T2	85.136	36.85	4	66	Male	165	59	21.6713	No	No	No	No	0.1	No	94	121	77	1	6.04	76	3.63	1.33	30.2	33.37	832	527	4.28	142.9	143.079	113.37	28.6158	105.182	11939	60	49	37	Yes	Yes	Yes	Yes
36	0	957.631	T2	104.876	57	0	36	Male	165	60	22.0386	Yes	No	No	No	3	No	66	104	74	1	17.01	156.2	11.74	2.8	43	7.42	95	480	4.56	139.2	180.202	88.57	51.0444	103.636	2212	76	61	42	Yes	Yes	Yes	Yes
626	0	958.042	T2	97.4886	43.2	3	56	Male	167	75	26.8923	No	No	Yes	No	0.2	No	86	99	72	3	6.83	142.3	3.26	2.24	32	17.61	165	722	4.35	134.6	171.695	74.3988	23.5887	134.572	5742	66	52	42	Yes	Yes	Yes	Yes
1273	1	962.069	T2	131.584	56.1	0	48	Female	152	76	32.8947	No	No	No	No	0.2	No	81	123	73	3	5.91	134	3.54	1.86	46.8	6.35	63	176	4.48	140.7	185.616	68.1989	36.7365	131.865	1076	59	49	35	Yes	Yes	Yes	Yes
1179	1	963.253	T2	96.0687	41.7	4	62	Female	158	51.5	20.6297	No	Yes	No	No	9	Yes	74	88	44	3	7.6	134	6	0.7	38.2	7.83	82	337	4.57	136	166.281	112.484	39.4434	103.636	5883	88	71	38	Yes	Yes	Yes	Yes
358	0	978.286	T2	111.936	53.15	1	46	Male	170	70.5	24.3945	Yes	No	No	No	0.2	No	102	101	66	2	6.28	135.9	3.78	1.67	44.8	2	64	402	3.76	143.8	141.145	98.3127	40.6035	82.7538	1242	67	55	36	Yes	Yes	Yes	Yes
1608	0	983.262	T2	84.4216	35.65	6	71	Male	170	55	19.0311	No	No	Yes	No	1	No	77	140	65	4	4.09	160.8	3.23	0.53	33	7.61	71	400	3.78	134.8	147.333	121.341	4.2537	109.436	6692	70	58	34	Yes	Yes	Yes	Yes
173	1	991.309	T2	96.3586	54.8	1	22	Male	160	53	20.7031	No	No	No	No	0.99	No	78	83	68	4	8.33	125.4	4.35	3.18	38.9	7.71	120	823	3.57	136.1	166.281	112.484	39.4434	103.636	8318	70	63	22	Yes	No	Yes	No
582	0	992.516	T2	112.429	51	1	41	Male	169	81	28.3604	No	No	No	No	30	No	113	95	65	2	4.99	146	2.45	2.16	40.2	8.75	80	464	3.61	140.3	160.867	76.1702	35.5764	97.4484	663.4	72	60	33	Yes	Yes	Yes	No
2190	0	992.566	T2	98.7634	48.75	1	55	Male	163	63	23.7118	Yes	No	Yes	No	3	No	68	85	55	4	5.98	153.3	2.83	2.39	36.8	4.35	73	378	4.1	140.9	177.882	88.57	43.6971	104.796	3025	73	61	35	Yes	Yes	Yes	Yes
871	0	993.076	T2	98.284	54.45	0	64	Male	162	55	20.9572	No	No	No	No	0.1	No	103	117	82	2	9.95	153.3	6.05	2.91	39.9	10.94	120	598	4.39	139.3	237.047	76.1702	45.2439	187.163	16047	90	75	33	Yes	Yes	Yes	Yes
1294	0	994.27	T2	104.135	46.7	2	63	Male	160	59	23.0469	No	Yes	Yes	No	5	No	135	111	96	3	7.3	141	5.4	1.1	41.2	9.57	105	766	3.4	134.5	192.19	87.6843	34.0296	123.357	12566	72	65	20	Yes	Yes	Yes	Yes
1067	0	995.347	T2	99.8703	46.2	1	39	Male	168	70	24.8016	Yes	No	No	Yes	0.1	No	110	126	80	4	10.59	134	7.31	2	36.2	4.75	97	594	4.75	135.7	150.04	94.7699	29.0025	107.503	2583	70	61	27	Yes	Yes	Yes	Yes
9	1	995.443	T2	96.5463	46.85	2	41	Male	180	70	21.6049	Yes	No	No	No	0.5	No	89	80	45	4	9.51	135.1	6.87	1.81	37.8	6.24	79	546	4.08	135.2	133.798	106.284	22.8153	90.8745	2185	83	74	24	No	No	Yes	Yes
863	0	995.882	T2	103.365	57.55	1	65	Female	155	57	23.7253	No	Yes	No	No	1	No	74	88	54	2	8.65	85.8	4.28	3.65	39.3	20.96	118	542	4.96	137.7	168.601	103.627	39.8301	108.663	359.8	64	52	36	Yes	Yes	Yes	No
156	0	1011.87	T2	108.647	50.8	1	35	Female	150	58.5	26	No	No	No	No	0.3	No	96	120	92	2	10.17	128.9	7.4	2.12	40.2	5.96	63	524	3.81	145.9	171.308	100.97	34.803	129.544	1418	70	57	38	Yes	Yes	Yes	Yes
425	1	1024.03	T2	99.0483	45.8	1	63	Male	165	65	23.8751	No	No	Yes	Yes	3	No	105	111	86	3	9.33	125	6.74	1.8	36.8	3.82	99	348	3.72	143.1	163.187	96.5413	37.1232	94.7415	2054	75	66	24	Yes	No	Yes	Yes
54	1	1028.72	T2	93.7995	45.6	3	15	Female	154	55	23.1911	No	No	No	No	0.1	No	102	93	65	3	8.89	83.6	5.66	2.4	33.6	5.75	79	426	4.1	141.7	166.281	112.484	39.4434	103.636	7339	67	58	30	Yes	No	Yes	Yes
545	0	1028.72	T2	107.268	53.2	1	52	Female	151	55	24.1217	No	Yes	No	No	0.6	No	100	123	99	3	5.58	171.7	2.62	2.32	41.6	5.03	91	617	3.91	138.7	166.281	112.484	39.4434	103.636	5504	60	53	25	Yes	Yes	Yes	Yes
894	0	1029.71	T2	92.2855	43.3	2	45	Female	155	45	18.7305	No	No	No	No	3	No	69	86	61	4	5.3	140.9	3.72	1.02	38.2	4.05	49	504	3.76	136.7	253.288	90.3414	40.6035	178.269	3382	72	63	26	Yes	Yes	Yes	Yes
2037	0	1031.41	T2	97.1748	44.8	1	61	Male	168	60	21.2585	Yes	No	Yes	No	0.2	No	126	114	90	4	13	148	10.5	1.2	38.8	5.5	85	474	4.6	135.5	184.843	92.9985	44.4705	117.557	3984	61	50	36	Yes	Yes	Yes	Yes
287	1	1031.95	T2	86.7705	47.95	3	40	Male	159	50	19.7777	Yes	Yes	No	No	4	No	94	98	80	3	8.32	159	4.66	2.87	33.6	10.7	106	699	4.08	135.3	177.882	116.027	28.6158	122.971	6886	68	57	35	Yes	Yes	Yes	Yes
1592	0	1033.13	T2	95.4301	46.5	2	60	Male	179	63	19.6623	Yes	No	Yes	No	0.3	No	64	111	92	2	4.6	112	2.2	1.4	39.5	4.81	86	512	3.89	141	176.335	92.9985	42.9237	110.596	5049	68	53	44	Yes	Yes	Yes	No
13	1	1037.58	T2	101.55	44.65	2	42	Male	174	76	25.1024	Yes	No	No	No	0.2	No	108	94	69	4	9.75	126.8	6.85	1.55	36.9	4.55	54	355	3.82	134.1	149.653	91.2271	19.7217	106.729	3966	76	66	27	No	Yes	Yes	Yes
1813	0	1043.29	T2	99.6221	48.15	1	59	Male	170	65	22.4913	No	Yes	No	Yes	0.1	Yes	82	123	62	2	6.71	135.3	4.03	1.85	38.9	4.12	75	317	4.35	136	142.692	112.484	31.3227	83.9139	2063	62	49	41	Yes	Yes	Yes	No
1956	0	1053.17	T2	97.2649	50.45	0	33	Male	164	56	20.8209	Yes	No	Yes	No	2	No	68	88	66	3	8.39	171.1	4.69	2.21	39.4	7.97	95	553	5.93	135.8	223.513	84.1415	43.3104	142.692	1311	57	49	29	Yes	Yes	Yes	No
880	0	1054.15	T2	116.153	46.35	2	55	Male	172	95	32.112	Yes	Yes	No	No	0.1	No	92	125	91	4	10.15	124	6.84	1.67	38	8.53	137	882	4.16	145	129.158	85.9129	27.069	87.0075	969.6	75	70	14	Yes	Yes	Yes	Yes
573	0	1055.99	T2	77.5263	35.85	5	63	Male	170	54	18.6851	Yes	Yes	No	No	1	No	100	97	55	4	5.04	142.9	2.67	1.41	28.8	4.5	94	578	3.47	134.8	188.71	103.627	26.6823	151.2	14876	68	57	23	Yes	No	Yes	Yes
221	0	1066.43	T2	113.622	56.3	1	39	Male	170	91	31.4879	No	Yes	No	No	0.1	No	78	131	86	3	12.05	148.4	6.86	3.84	37.1	6.09	101	512	3.93	138.2	145.399	80.5987	35.5764	91.6479	1849	62	55	26	Yes	Yes	Yes	Yes
1512	0	1071.54	T2	102.463	49	0	64	Female	153	52	22.2137	No	No	No	No	2	No	95	134	89	2	5.82	116.3	3.25	1.66	40.7	3.59	50	222	3.81	138	221.579	92.9985	44.4705	143.079	6504	58	50	29	Yes	Yes	Yes	No
1202	1	1071.7	T2	86.3293	36.5	5	51	Male	167	60	21.5139	No	No	No	Yes	1	No	79	110	81	4	9.76	137	7.57	1.06	31.2	10.92	107	614	3.43	137.1	166.668	107.17	28.2291	116.01	12310	68	57	44	No	Yes	Yes	Yes
313	0	1073.82	T2	94.8276	44.15	1	56	Male	167	58	20.7967	Yes	No	No	No	0.1	No	83	145	82	3	10.12	130.7	7.77	1.27	37.8	4.67	78	485	3.96	142.8	180.202	102.741	48.7242	116.01	1866	61	50	37	Yes	Yes	Yes	Yes
314	0	1078.28	T2	94.0072	35.85	8	51	Male	165	67	24.6097	Yes	Yes	Yes	No	5	Yes	81	86	59	2	9.86	101	8.61	0.67	32.5	12.18	212	429	3.63	139.5	80.0469	201.054	20.8818	38.67	1760	71	58	37	Yes	Yes	Yes	Yes
219	0	1085.56	T2	97.176	40.7	3	66	Male	164	63	23.4236	No	No	No	No	2	No	85	124	78	4	6.68	114.7	5.19	0.92	36.1	5.07	109	509	4.61	142.6	166.281	103.627	37.5099	103.636	4106	72	63	28	Yes	Yes	Yes	Yes
2174	0	1098.06	T2	100.663	50.1	2	42	Male	158	46	18.4265	Yes	No	Yes	No	0.6	No	70	98	70	3	4.3	161	2.2	1.1	44.6	6.94	83	466	4.79	139.7	222.739	107.17	43.3104	156.613	1952	68	62	18	Yes	Yes	Yes	Yes
1423	0	1100.37	T2	104.812	53.2	1	59	Male	165	61	22.4059	Yes	No	No	No	0.1	No	78	140	81	3	7.55	142.9	4.55	2.14	42.5	7.07	78	434	4.03	136.1	154.293	116.912	45.6306	93.5814	813.5	82	65	41	Yes	Yes	Yes	Yes
444	0	1102.61	T2	101.992	55.2	0	66	Male	171	50	17.0993	No	No	No	No	0.6	No	85	128	87	2	7.4	136.8	4.94	1.6	47.2	5.83	112	304	4.1	141.3	197.604	111.598	60.3252	109.049	1367	57	48	33	Yes	Yes	No	Yes
1843	0	1103.53	T2	110.361	53.8	1	44	Male	156	59	24.2439	No	Yes	No	No	0.2	No	68	103	56	3	5.61	168.5	2.78	2	43.8	8.52	110	517	3.87	136	166.281	112.484	39.4434	103.636	1662	65	58	22	No	No	Yes	No
330	1	1109.39	T2	104.762	44.6	4	66	Male	166	63	22.8625	No	Yes	No	No	4	No	70	101	85	4	9.94	142.5	9.31	0.54	41.9	12.78	141	554	4.57	136.2	174.402	100.97	23.9754	121.424	9468	63	54	30	No	No	Yes	Yes
1446	0	1110.79	T2	111.392	52.4	1	62	Male	163	70	26.3465	Yes	No	No	No	12	No	63	137	74	3	6.9	146.7	4.02	2.08	42	4.71	59	387	3.87	140.3	167.441	94.7699	40.9902	113.69	6481	64	54	34	No	Yes	Yes	Yes
1335	0	1112.3	T2	91.7206	51.75	0	35	Male	174	59	19.4874	Yes	No	No	No	0.1	No	114	94	72	3	8.96	138.6	5.42	2.89	37.3	6.56	103	541	3.68	138.2	215.005	87.6843	51.8178	138.052	4255	68	52	44	Yes	Yes	Yes	Yes
279	0	1120.72	T2	91.1772	43.2	3	76	Male	165	60	22.0386	Yes	Yes	No	No	0.1	Yes	85	145	81	4	6.75	125.7	3.61	1.88	33.8	4.34	63	288	2.64	142.7	155.067	120.455	26.2956	112.916	2669	74	60	38	Yes	No	Yes	Yes
827	1	1122.24	T2	99.201	47.85	1	55	Male	163	60	22.5827	Yes	No	No	No	7	No	102	87	61	3	5.66	129.9	3.12	1.87	38.5	7.28	93	371	3.8	144.5	166.281	112.484	39.4434	103.636	1609	68	57	34	Yes	Yes	Yes	Yes
771	1	1140.25	T2	93.8141	41.3	5	60	Female	160	50	19.5312	No	Yes	No	No	5	No	101	95	70	4	8.15	118.6	6.69	0.66	38	13.35	86	622	3.31	138.6	126.838	179.797	24.7488	59.5518	6693	64	58	20	Yes	Yes	Yes	Yes
2	1	1140.94	T2	103.269	48.55	1	65	Male	162	61	23.2434	Yes	No	Yes	No	0.2	No	82	114	82	2	7.11	135.4	4.26	1.63	40.4	6.19	172	502	3.4	142.2	166.281	112.484	39.4434	103.636	2691	72	57	42	Yes	Yes	Yes	Yes
2270	0	1143.17	T2	91.0889	47.45	2	33	Male	170	64	22.1453	Yes	No	No	Yes	0.1	No	100	138	100	4	8.7	162	4.91	2.77	33.6	4.93	112	399	3.58	141.1	190.256	93.8842	42.537	119.877	12585	69	61	22	No	Yes	Yes	Yes
447	0	1151.27	T2	110.071	53.7	1	39	Male	160	60	23.4375	Yes	No	No	No	0.6	No	97	103	69	3	3.67	122.5	0.9	1.8	44.7	5.95	92	779	4.47	141.9	179.042	107.17	39.4434	111.756	1249	71	61	29	Yes	Yes	Yes	Yes
163	0	1153.6	T2	101.686	44.55	2	41	Male	163	61	22.9591	Yes	No	No	No	6	No	91	89	64	4	5.29	112.8	3.7	0.97	39.7	4.32	71	478	3.64	130.9	184.069	102.741	26.2956	136.892	2774	84	68	38	Yes	No	Yes	Yes
293	0	1155.43	T2	95.675	38.65	4	48	Male	164	74	27.5134	No	No	No	No	0.1	No	92	128	70	1	9.8	76.1	6.2	1.73	30	22.33	328	712	4.04	141.2	134.572	116.027	27.8424	88.941	4262	77	63	36	No	No	Yes	No
714	0	1155.57	T2	100.149	53.4	0	73	Female	140	40	20.4082	No	No	No	No	0.1	No	77	113	55	4	7.14	122.5	3.36	2.32	41.8	6.78	64	337	5.22	138.5	247.101	116.912	66.1257	162.414	819.8	67	54	38	Yes	Yes	Yes	Yes
485	1	1167.27	T2	92.1118	45.85	2	73	Male	165	50	18.3655	No	No	No	Yes	20	Yes	68	103	66	2	7.16	130	4.59	1.37	39	5.7	79	402	3.48	137.3	152.36	153.226	35.5764	101.702	3352	85	72	32	Yes	No	Yes	Yes
27	1	1169.62	T2	85.4481	33.05	6	61	Male	173	60	20.0474	No	No	No	Yes	0.1	No	98	131	82	3	4.49	86	4.23	0.13	32.4	8.12	109	389	3.64	143.3	143.852	135.512	35.5764	83.9139	12013	64	50	42	Yes	Yes	Yes	Yes
1887	0	1171.09	T2	111.635	58.6	0	51	Female	151	50	21.9289	No	No	No	No	2	No	64	126	78	2	5.77	138.2	2.88	2.26	47.3	8.81	76	730	4.31	140.3	187.549	124.884	52.9779	116.783	3862	76	70	17	No	No	Yes	Yes
691	0	1178.13	T2	123.782	63.4	1	37	Male	168	69	24.4473	Yes	No	No	No	0.1	No	77	123	77	2	10.55	153.4	7.55	2.14	52.7	5.23	80	339	4.41	139.6	159.32	107.17	30.5493	112.53	71.69	63	49	44	Yes	No	Yes	No
2250	0	1178.35	T2	97.1357	54.9	1	42	Male	173	63	21.0498	No	No	No	No	20	No	107	79	58	4	7.15	155.8	3.43	3.18	39	7.6	110	361	3.6	141.4	166.281	112.484	39.4434	103.636	2047	70	61	28	Yes	Yes	Yes	Yes
703	0	1180.14	T2	90.78	41.55	2	70	Male	170	67	23.1834	No	No	No	No	0.1	No	97	127	74	1	5.25	122	2.55	1.89	32.1	5.27	116	486	3.78	142.5	216.165	81.4844	49.1109	136.505	1381	67	57	23	Yes	Yes	Yes	Yes
1477	1	1189.6	T2	98.5849	45.2	3	70	Male	166	64	23.2254	No	No	Yes	No	0.99	No	68	110	84	4	7.53	118.8	5.27	1.58	37.3	9.49	117	846	3.87	143.2	129.544	143.483	19.7217	72.6996	5086	77	64	34	Yes	Yes	Yes	Yes
272	1	1197.05	T2	93.918	45.45	1	55	Male	170	64	22.1453	No	No	No	Yes	2	No	93	97	75	3	9.22	136.9	6.44	1.99	35.5	10.27	149	568	3.52	140.7	166.281	112.484	39.4434	103.636	5617	95	87	18	Yes	Yes	Yes	Yes
1357	0	1211.72	T2	101.306	46.3	1	51	Male	160	59	23.0469	No	No	No	No	0.8	No	78	145	90	3	5.68	129.5	3.54	1.4	39.3	7.33	126	560	4.53	141.1	203.404	100.97	42.537	154.68	13271	74	65	27	Yes	Yes	Yes	No
981	0	1212.16	T2	106.425	50.9	1	76	Male	164	60	22.3081	Yes	No	No	No	0.99	No	93	102	70	4	9.48	148.4	5.99	1.44	43.7	7.73	93	410	5.46	133.6	201.857	100.084	61.872	136.118	1127	75	63	33	Yes	Yes	Yes	Yes
569	0	1215.76	T3	101.151	51.45	1	51	Male	169	65	22.7583	No	No	Yes	No	1	No	101	120	72	4	7.12	144.9	3.99	2.37	39.6	8.41	80	426	4.31	140	166.281	112.484	39.4434	103.636	1981	69	59	31	Yes	Yes	Yes	Yes
716	0	1215.76	T3	84.6748	33.1	7	51	Male	168	65	23.03	Yes	Yes	No	Yes	0.2	No	100	97	76	4	7.7	141.1	5.79	0.98	28.2	12.29	86	292	4.51	133.6	166.281	112.484	39.4434	103.636	8809	70	60	29	Yes	Yes	Yes	Yes
1885	0	1217.85	T3	114.203	60.4	0	53	Male	165	70.2	25.7851	Yes	Yes	No	No	4	No	106	141	106	2	9.34	112.1	5.15	3.16	44.6	8.56	82	554	4.04	141.7	233.18	74.3988	56.4582	162.414	2651	66	51	44	Yes	Yes	Yes	Yes
1253	0	1219.63	T3	99.4358	46.8	0	67	Female	151	52	22.806	No	Yes	No	No	0.3	No	65	127	81	3	4.95	108	2.15	1.76	38	3.71	76	385	3.14	142.5	247.488	94.7699	41.7636	195.284	4750	63	50	41	Yes	Yes	Yes	No
966	1	1226.22	T3	110.518	48.45	1	64	Male	171	78	26.6749	No	No	Yes	No	20	No	62	100	50	2	3.83	135.2	1.81	1.49	41	7.6	97	594	4.21	140.7	197.217	79.713	51.4311	131.091	3193	69	62	21	Yes	Yes	Yes	Yes
857	0	1226.22	T3	103.061	44	2	48	Female	174	75	24.7721	No	No	No	No	0.1	No	113	90	70	2	5.53	136.4	3.32	1.48	36.6	5.33	85	652	4.32	140.6	170.921	95.6556	32.4828	124.904	3446	71	61	29	Yes	Yes	Yes	Yes
568	0	1240.42	T3	107.827	47.5	0	78	Male	163	73	27.4756	No	No	Yes	No	1	No	55	134	70	2	9.45	146	6.64	1.86	38.2	7.53	91	460	3.71	140	242.848	69.9703	48.7242	165.508	1112	86	69	39	No	Yes	Yes	No
2232	0	1249.45	T3	104.79	64.35	0	66	Female	168	59	20.9042	No	No	Yes	No	0.2	No	60	102	70	2	7.3	150	1.72	4.23	43.2	10.41	67	410	4.39	137.4	197.604	107.17	56.0715	109.049	967.9	52	43	34	Yes	Yes	Yes	No
1863	0	1254.61	T3	117.568	55.15	2	46	Male	164	82	30.4878	Yes	Yes	No	No	0.3	No	82	98	74	3	7.77	163.4	3.41	2.83	41	6.16	100	923	3.57	141.5	134.958	113.37	30.936	72.6996	6481	56	48	31	Yes	Yes	Yes	No
939	0	1259.44	T3	95.3485	40.85	3	76	Male	159	56	22.151	Yes	Yes	No	No	0.6	No	97	104	69	2	5.46	116.7	3.81	0.89	36.4	6.25	84	437	3.9	141.4	167.054	134.626	47.5641	90.1011	1951	59	47	40	Yes	Yes	Yes	No
1300	0	1260.99	T3	105.695	53.5	0	58	Male	160	63	24.6094	No	No	No	No	0.4	No	75	121	69	4	6.43	163	1.81	2.64	40.3	7.64	102	349	4.04	136.5	188.323	106.284	39.8301	127.611	544.1	63	47	44	Yes	Yes	No	Yes
1030	0	1265.26	T3	99.9461	47.7	0	26	Male	160	60	23.4375	Yes	No	No	No	0.1	No	107	128	81	2	6.83	134.5	4.12	1.96	37.9	3.96	91	372	4.29	142.5	181.749	116.027	35.1897	119.49	2780	61	49	39	Yes	No	Yes	Yes
208	1	1271.53	T3	93.9262	42.35	4	32	Male	162	60	22.8624	No	No	No	No	0.2	No	108	94	62	4	12.56	133.6	9.43	1.55	34.6	19.31	387	444	4.45	129.6	145.013	146.14	25.1355	80.0469	35000	81	68	31	Yes	Yes	Yes	Yes
1595	0	1282.45	T3	99.5129	57.8	0	63	Female	156	37	15.2038	No	No	No	No	6	No	95	142	88	3	8.69	116.8	5.51	2.06	47.5	5.46	62	371	3.41	139.5	213.845	162.083	64.9656	98.2218	1280	61	54	22	Yes	Yes	Yes	Yes
761	1	1289.9	T3	98.1118	52.35	0	55	Male	165	61	22.4059	Yes	Yes	No	No	0.4	No	114	108	89	4	9.13	139.2	5.59	2.87	38	9.65	113	941	4.44	141.4	265.276	79.713	34.0296	192.19	8870	64	55	31	Yes	Yes	Yes	Yes
577	0	1295.29	T3	113.852	60.25	0	57	Female	155	55	22.8928	No	Yes	No	No	4	No	76	103	61	3	8.78	124.2	5.27	2.57	47.4	6.89	96	871	3.32	141.6	199.924	117.798	40.2168	124.904	2655	51	39	43	Yes	Yes	Yes	Yes
1516	0	1301.92	T3	104.158	47	1	68	Male	153	57	24.3496	No	No	No	No	0.8	No	80	116	72	3	8.9	153.6	5.21	1.52	39.4	7.5	102	587	4.66	140.1	201.471	113.37	54.5247	129.158	1503	67	57	31	Yes	Yes	Yes	Yes
432	1	1302.13	T3	107.854	58.9	0	55	Male	168	52	18.424	No	No	No	No	0.4	No	59	118	71	2	8.55	130.4	5.83	1.88	49.5	7.85	77	432	3.58	139	191.03	131.084	56.0715	108.276	916.9	74	65	25	Yes	Yes	Yes	Yes
865	1	1305.38	T3	96.289	44.7	1	29	Male	168	65	23.03	No	No	Yes	No	0.1	No	78	97	74	4	6.17	145.2	3.9	1.74	36	4.13	71	414	4.36	143	165.508	121.341	39.8301	108.276	3391	71	60	31	Yes	Yes	Yes	Yes
990	0	1311.35	T3	102.176	51.65	1	58	Male	168	59	20.9042	Yes	No	No	No	0.1	No	86	102	93	2	6.71	146.2	3.84	1.81	42.6	7.62	94	683	4.1	138.7	176.722	125.769	64.9656	87.0075	1998	73	65	23	Yes	Yes	Yes	Yes
160	0	1319.83	T3	114.35	54	0	57	Female	162	72.5	27.6254	No	No	No	No	3	Yes	66	130	69	2	5.84	121.2	2.81	2.54	41.3	6.88	86	339	4.58	139.6	233.567	77.9416	63.4188	146.946	759.9	68	57	44	Yes	Yes	Yes	No
1611	0	1327.98	T3	98.2988	36	6	57	Female	155	71	29.5525	No	No	No	No	0.6	No	107	156	103	4	6.7	128	4.5	1.5	28.5	5.96	70	847	3.7	139.2	166.281	112.484	39.4434	103.636	18109	71	59	33	Yes	Yes	Yes	No
54	0	1332.9	T3	100.441	54.4	1	51	Male	178	62	19.5682	Yes	No	No	No	1	No	88	91	62	4	14.44	157.1	11.01	2.28	43	25.18	147	933	5.35	136.6	165.121	130.198	32.8695	111.756	5223	80	65	37	Yes	Yes	Yes	Yes
695	0	1338.22	T3	102.101	40.95	4	51	Male	169	80	28.0102	No	Yes	Yes	No	4	No	65	99	65	4	12.77	134.3	10.4	1.45	33.7	8.07	82	431	3.81	132.8	170.148	98.3127	27.8424	126.451	2019	78	65	33	Yes	Yes	Yes	Yes
956	0	1340.21	T3	93.0504	52.85	0	55	Male	167	49.5	17.7489	No	No	Yes	No	0.1	No	62	120	70	4	7.54	161	4.28	2.49	40.4	7.52	80	368	4.43	139.6	189.87	142.598	44.8572	120.264	651.8	65	55	32	Yes	Yes	Yes	Yes
1323	0	1343.96	T3	111.845	53.45	1	42	Female	162	66	25.1486	No	Yes	No	No	5	No	91	121	77	4	11.96	133	8.73	2.13	42.8	5.81	80	397	4.14	134.7	141.919	143.483	26.6823	91.6479	8796	70	60	32	Yes	Yes	Yes	Yes
758	0	1345.41	T3	103.434	47.1429	2	61	Male	169	71.5	25.0341	No	No	No	No	4	No	85	135	90	3	5.82	107	5.36253	1.76859	38.3	4.74	82	439	3.73	139	129.544	145.255	25.1355	83.5272	6481	82	69	31	No	No	Yes	Yes
1890	0	1345.45	T3	97.7494	48.65	0	57	Male	165	55	20.202	No	No	No	No	0.1	No	87	117	77	2	5.2	127.1	2.92	1.63	40.5	5.53	74	325	4.47	135.1	215.779	113.37	39.8301	146.173	6481	61	57	25	Yes	Yes	Yes	Yes
1960	0	1349.32	T3	134.804	45.6	1	34	Male	178	138	43.5551	Yes	No	No	No	0.1	No	109	155	125	4	9.72	124.9	7.09	1.9	36.1	7.3	103	473	4.6	135.9	141.532	69.0846	34.0296	89.3277	5487	72	55	44	Yes	Yes	Yes	Yes
765	0	1350.36	T3	102.307	43.6	2	86	Male	161	62	23.9188	No	Yes	Yes	No	6	No	105	116	74	4	4.99	121	3.28	0.94	38.9	4.45	106	354	4.25	128.7	199.924	108.941	54.9114	112.916	6278	68	55	39	Yes	No	Yes	Yes
883	0	1352.14	T3	101.31	46.65	3	52	Male	168	76.5	27.1046	Yes	No	No	No	0.2	No	70	140	77	3	6.03	123	2.43	2.47	34.3	4.7	76	455	3.45	142.5	163.574	108.055	36.3498	109.436	3178	97	83	30	No	Yes	Yes	Yes
865	0	1385.83	T3	108.767	68.15	0	63	Male	172	59	19.9432	Yes	No	Yes	Yes	2	No	75	147	94	2	11.7	172.6	6.11	3.99	48.2	11.82	125	449	4.36	137.2	208.818	112.484	45.6306	141.532	5478	69	53	44	Yes	Yes	Yes	Yes
768	0	1389.57	T3	98.9877	45.85	0	46	Male	172	70	23.6614	Yes	No	No	No	9	No	94	88	72	2	6.47	127.1	3.99	1.77	37	3.81	80	581	3.36	141.8	185.229	107.17	25.1355	141.145	1766	71	67	12.5	Yes	Yes	Yes	Yes
458	0	1389.87	T3	99.038	43.05	1	58	Male	168	71	25.1559	No	No	Yes	No	0.1	No	85	113	86	4	7.68	121.8	5.13	1.57	35.2	5.42	88	386	3.61	138.4	192.19	101.855	31.7094	136.892	3723	77	63	38	Yes	Yes	Yes	Yes
1432	0	1396.03	T3	119.601	53.7	1	69	Female	153	67	28.6215	No	No	No	No	0.2	No	73	133	82	3	5.34	130	2.88	1.92	44.1	5.37	64	358	3.88	142.5	175.562	118.684	64.1922	87.0075	958.4	68	58	29	Yes	Yes	Yes	Yes
2133	0	1399.88	T3	98.8128	44.6	1	58	Male	160	57	22.2656	No	No	No	No	2	No	71	104	70	3	7.9	137	5.9	1.2	38.6	4.43	98	306	4.53	139.5	243.234	100.97	51.0444	161.641	1179	68	60	24	Yes	Yes	Yes	Yes
881	0	1401.68	T3	95.2199	50.65	1	44	Male	160	58	22.6562	Yes	Yes	Yes	No	2	No	98	121	97	3	13.65	138.2	9.43	2.99	35.7	6.81	89	402	4.79	136	170.535	141.712	30.936	119.49	6336	61	52	33	Yes	Yes	Yes	Yes
1110	0	1414.85	T3	111.048	51.1	1	64	Male	162	64	24.3865	Yes	No	No	No	0.5	No	91	106	71	3	8.12	145.6	6.3	1.38	44.2	10.2	117	753	4.53	138.7	211.525	104.513	71.9262	112.916	602.9	72	59	37	Yes	Yes	Yes	Yes
1203	0	1419.8	T3	115.463	46.3	1	52	Male	173	100	33.4124	Yes	No	No	No	4	No	64	140	87	2	6.74	128.8	3.81	2.08	35.9	9.83	99	489	4.16	139.5	163.574	86.7986	34.4163	98.2218	1152	77	65	31	Yes	Yes	Yes	Yes
377	0	1440.2	T3	118.833	60	1	52	Female	160	77	30.0781	No	Yes	No	No	6	No	85	114	77	4	13.06	129.5	8.1	3.74	41.3	8.85	104	705	4.25	137.5	166.281	112.484	39.4434	103.636	2222	75	67	20	Yes	Yes	Yes	Yes
948	0	1440.55	T3	115.322	52.65	1	66	Male	165	76	27.9155	No	No	No	No	1	No	105	107	83	3	9.95	156.1	6.84	1.99	42.7	6.35	79	515	4.01	141.5	159.707	118.684	34.0296	103.636	5485	67	57	27	Yes	Yes	Yes	Yes
731	0	1443	T3	106.292	49.15	0	31	Male	172	75	25.3515	Yes	Yes	No	No	2	No	137	130	81	4	9.11	165	6.11	1.87	39.8	5.13	76	274	4	137	203.018	94.7699	35.9631	153.52	12704	80	69	26	Yes	Yes	Yes	Yes
1536	0	1453.95	T3	99.9757	53.05	0	62	Male	161	55	21.2183	Yes	No	No	No	0.1	No	100	129	80	2	9.48	130.1	5.03	2.47	40.7	5	88	546	4.62	141.1	207.271	127.541	83.9139	105.569	2365	64	51	42	Yes	Yes	Yes	Yes
376	0	1464.91	T3	103.174	50	0	35	Male	170	71	24.5675	Yes	No	No	No	0.1	No	116	120	95	4	7.07	144.2	3.8	2.26	38.7	6.73	106	574	3.48	142.1	217.712	94.7699	49.4976	160.867	1127	68	56	37	Yes	Yes	Yes	No
515	0	1472.8	T3	102.968	52.3	1	69	Female	164	61	22.68	No	Yes	Yes	No	0.3	No	53	100	52	3	6.53	135	3.3	2.48	39.9	8.9	92	568	4.3	138.4	146.559	164.74	35.9631	82.3671	2776	65	53	37	Yes	Yes	Yes	Yes
622	0	1484.69	T3	107.406	49	1	65	Male	172	82	27.7177	No	No	No	No	0.6	No	93	114	73	2	9.45	120.4	6.24	2.28	37.6	6.64	120	368	4.1	140.6	173.242	104.513	37.1232	97.4484	1514	62	52	32	Yes	Yes	Yes	Yes
421	1	1487.41	T3	112.964	57.1	0	73	Male	152	70	30.2978	Yes	Yes	No	No	0.1	No	99	106	70	3	9.13	178.3	4.25	3.86	37.8	9.01	115	460	4.84	135.6	181.749	116.912	37.1232	126.064	3227	74	62	33	Yes	Yes	Yes	Yes
992	0	1493.59	T3	98.9668	44.75	0	36	Male	182	80.5	24.3026	Yes	No	No	No	0.1	No	106	122	95	4	7.25	159	4.8	1.75	36	4.67	102	558	4.13	138.6	180.589	102.741	27.4557	126.451	1491	79	64	38	Yes	No	Yes	No
765	1	1522.35	T3	109.645	64.25	0	46	Male	175	73	23.8367	No	Yes	No	No	4	No	56	130	84	3	10.34	141.6	5.19	4.07	43.9	7.07	106	405	3.99	141.3	182.522	114.255	80.8203	86.2341	574.9	82	74	22	Yes	Yes	Yes	Yes
113	1	1524.87	T3	111.315	52.2	0	68	Male	160	65	25.3906	Yes	No	Yes	No	7	No	116	106	89	4	7.48	123.3	4.89	1.82	43.1	7.34	96	451	4.9	140.6	257.156	91.2271	47.9508	176.722	3260	78	65	33	No	No	Yes	Yes
8	1	1535.74	T3	102.763	43.75	3	73	Male	175	70	22.8571	Yes	Yes	No	No	9	No	118	125	74	4	12.09	143	11.07	0.65	40.5	14.44	120	886	3.82	134.7	182.136	120.455	49.4976	111.37	21586	80	68	33	Yes	Yes	Yes	No
2123	0	1547.42	T3	91.1354	36.95	4	43	Male	158	60	24.0346	Yes	No	No	No	0.1	No	103	174	98	4	11.41	78.6	8.3	1.15	31.2	19.46	567	408	3.84	138	194.123	132.855	51.8178	107.503	6481	64	51	40	No	No	Yes	Yes
1620	1	1625.22	T3	105.063	47.9	1	69	Male	170	70	24.2215	No	No	No	No	2	No	92	121	84	4	7.6	152	5.2	1.5	40.4	8.72	102	715	3.76	139.1	208.045	111.598	39.8301	135.345	3066	82	71	27	Yes	Yes	Yes	No
749	0	1638.31	T3	110.878	47.6	4	53	Male	174	73	24.1115	Yes	No	No	No	9	Yes	86	123	82	1	11.29	160.5	9.92	0.64	44.4	6.77	85	201	3.87	138.9	155.453	144.369	31.3227	92.4213	4570	64	50	44	Yes	Yes	Yes	No
934	0	1639.02	T3	104.766	51.15	2	55	Male	163	62	23.3355	Yes	No	No	No	3	No	92	102	56	2	7.54	144.4	4.71	1.97	41.3	5.27	74	532	3.71	142.3	138.825	190.425	32.8695	73.0863	2146	77	68	26	Yes	Yes	Yes	Yes
693	0	1654.59	T3	100.614	49.6	1	48	Female	152	59	25.5367	No	No	No	No	0.1	No	99	132	78	2	12.04	126	7.69	2.86	35.3	5.35	62	323	3.68	133.9	177.882	157.655	42.1503	100.155	567.4	68	53	44	Yes	Yes	Yes	Yes
0	1	1658.3	T3	113.178	41.35	6	31	Male	165	105	38.5675	No	No	No	No	0.1	No	123	107	86	2	10.55	157.9	7.16	2.67	28	8.68	112	813	3.49	133	136.118	116.027	21.2685	91.2612	5909	68	60	26	Yes	Yes	Yes	Yes
1971	0	1664.77	T3	104.646	53.8	0	60	Male	168	58	20.5499	Yes	Yes	No	No	0.3	No	79	128	87	2	9.3	158.4	6.3	1.82	44.7	4.8	72	315	3.87	138.8	197.604	145.255	73.473	112.53	5327	67	58	24	Yes	Yes	Yes	Yes
981	0	1672.26	T3	114.285	51.05	0	54	Male	163	75	28.2284	Yes	Yes	No	No	4	No	108	111	75	3	7.06	125.8	4.43	1.89	41.6	5.64	63	494	3.48	140.4	203.018	109.827	51.8178	115.237	3519	88	75	31	Yes	Yes	Yes	Yes
1081	0	1684.62	T3	105.482	54.15	0	54	Male	174	71	23.4509	No	No	No	No	0.1	No	67	146	90	2	8.24	124.6	4.49	2.51	41.6	7.9	96	524	4.64	137.1	194.123	122.227	38.67	124.131	4487	78	65	35	Yes	Yes	Yes	Yes
959	0	1689.16	T3	115.942	55.55	0	41	Male	173	77	25.7276	Yes	Yes	No	No	0.3	No	93	100	60	2	9.33	136	6.25	1.95	45.8	5.35	104	593	4.19	141.6	235.887	92.9985	48.3375	141.919	2139	68	56	36	Yes	Yes	Yes	Yes
1082	0	1702.06	T3	109.842	44.6	2	47	Male	176	91	29.3776	No	Yes	No	Yes	0.1	No	72	117	70	3	4.82	133	2.72	1.5	37.1	8.13	82	341	4.27	141.6	166.281	112.484	39.4434	103.636	3022	108	88	36	Yes	No	Yes	Yes
1885	0	1704.54	T3	105.157	44.7	3	43	Male	172	85.3	28.8332	Yes	No	No	No	7	No	82	138	60	3	7.8	145	4.7	2	34.7	5.45	70	397	4.32	141.5	165.894	120.455	27.8424	100.929	1573	77	62	39	No	No	Yes	Yes
400	0	1712.64	T3	82.2941	33.5	6	53	Male	172	60	20.2812	Yes	No	No	No	0.7	No	86	118	72	3	18.36	134.7	17.09	0.7	30	7.61	89	492	3.46	138.3	179.042	159.426	29.7759	96.675	860.2	76	63	33	Yes	Yes	Yes	Yes
1283	0	1736.23	T3	104.334	51.7	1	65	Female	159	49	19.3821	No	Yes	No	No	1	No	90	134	80	3	5.93	140.6	4.2	1.28	45.3	9.46	99	296	4.15	139.1	242.461	146.14	63.0321	126.064	2859	69	58	33	No	Yes	Yes	Yes
350	0	1746.47	T3	114.342	52.3	1	45	Male	169	75	26.2596	Yes	No	No	No	4	No	74	132	81	2	6.73	144	4.09	1.64	44.1	4.8	82	358	4.26	138.4	151.973	153.226	37.8966	96.2883	100	64	50	42	Yes	Yes	Yes	No
878	0	1751.22	T3	109.188	45.6	2	41	Female	159	78	30.8532	No	Yes	No	No	0.1	No	86	128	85	4	9	118.5	5.76	2.34	33.9	4.46	89	364	4.05	142.3	186.389	120.455	43.6971	117.944	1190	80	64	39	No	No	Yes	Yes
848	0	1795.9	T3	117.904	55.7	0	41	Male	170	74	25.6055	Yes	No	Yes	No	2	No	102	112	81	2	10.1	155	7.32	1.68	47.3	4.59	79	449	3.89	146.2	192.963	125.769	33.6429	131.865	1151	72	57	41	Yes	Yes	Yes	Yes
1028	0	1800.79	T3	106.897	52.7	0	49	Male	163	61	22.9591	Yes	No	No	Yes	0.1	No	84	135	91	1	7.52	145.7	4.68	1.9	43.2	12.18	174	605	3.97	141.6	212.298	139.055	40.9902	143.466	2675	74	64	29	Yes	Yes	Yes	Yes
1215	0	1802.15	T3	101.07	46.75	2	46	Male	167	60	21.5139	No	No	No	No	0.1	No	99	95	61	3	5.47	146.6	3.03	1.13	41.1	5.3	96	503	4.44	137.2	194.897	154.112	41.3769	122.197	1413	67	56	34	Yes	Yes	Yes	Yes
121	0	1813.28	T3	110.493	51.9	0	46	Male	160	69	26.9531	Yes	Yes	No	No	0.2	No	100	111	82	3	8.15	148.3	5.09	2.26	40.6	13.92	151	903	4.17	137.5	215.005	122.227	56.0715	116.397	930.1	69	55	41	Yes	Yes	Yes	Yes
1091	0	1828.95	T3	116.711	55.95	1	33	Male	168	80	28.3447	Yes	No	No	No	0.3	No	118	123	75	1	8	143.6	4.71	2.57	43.1	4.77	67	372	3.71	139.3	172.082	132.855	38.2833	103.249	6481	64	55	31	Yes	Yes	Yes	No
1095	0	1866.78	T3	106.142	47.9	1	36	Male	160	63	24.6094	No	No	No	No	0.4	No	78	106	72	4	10.39	169.9	7.92	1.46	40.6	8.59	100	604	4.79	139.1	233.953	126.655	58.3917	136.505	2211	71	62	26	Yes	Yes	Yes	Yes
1465	0	1886.69	T3	112.393	52.6	1	76	Male	173	78	26.0617	No	No	No	No	14	No	76	123	77	3	5.97	131	3.06	1.92	43	5.97	140	360	4.4	144.1	159.707	151.455	34.4163	96.675	6481	77	67	28	No	Yes	Yes	Yes
654	0	1900.83	T3	101.067	39.7	4	53	Male	170	77	26.6436	No	No	No	No	0.6	No	87	91	57	3	12.85	141	11.09	1	34.7	13.08	143	564	3.82	141.7	188.323	131.084	40.2168	105.569	3027	75	62	34	Yes	Yes	Yes	Yes
25	1	1912.03	T3	119.428	51.7	1	64	Female	150	62.5	27.7778	No	No	No	No	2	No	105	143	89	3	7.6	118	5.4	1.3	45.2	5.64	102	539	3.88	140.3	192.963	158.54	64.5789	112.53	11342	72	57	40	Yes	Yes	Yes	Yes
705	0	1912.76	T3	110.927	57.4	1	46	Male	170	68	23.5294	Yes	No	No	No	0.1	No	69	92	63	2	8.01	149.5	4.88	2.44	45.2	7.92	83	438	3.87	135.6	179.429	156.769	48.3375	103.249	861.1	61	53	29	Yes	Yes	Yes	No
504	1	1912.94	T3	97.012	51	0	60	Male	171	56	19.1512	Yes	Yes	No	No	0.6	No	92	105	66	4	7.59	147	4.77	1.94	41.3	8.57	121	476	4.3	139.5	211.912	161.197	35.9631	162.414	3986	75	62	33	Yes	Yes	Yes	No
822	0	1919.18	T3	113.754	56.95	1	48	Male	172	85	28.7317	Yes	No	No	No	0.2	No	86	108	64	2	7.22	130.6	2.66	3.27	40.6	6.78	86	485	4.01	141.1	178.269	126.655	41.7636	115.237	1340	70	56	39	Yes	Yes	Yes	Yes
1873	0	1938.54	T3	117.876	47.3	2	52	Male	165	85	31.2213	No	No	No	No	5	No	78	100	54	4	5.67	134.4	3.41	1.4	40.3	3.84	77	295	4.2	137.5	143.852	158.54	29.3892	88.5543	607.9	79	64	38	Yes	Yes	Yes	Yes
2209	0	1940.88	T3	99.3243	51.35	1	33	Female	170	62	21.4533	No	No	No	No	0.1	No	98	116	88	4	7.36	104.2	4.07	2.53	38.7	5.77	116	631	3.36	142.3	176.722	177.14	52.2045	76.9533	2697	64	50	43	Yes	Yes	Yes	No
962	0	1980.82	T3	111.281	46.2	1	45	Male	165	81	29.7521	No	No	No	No	0.1	No	78	111	84	4	5.92	159.6	3.31	1.7	37.7	6.59	93	618	4.09	140.2	162.414	150.569	42.537	93.9681	2079	74	61	34	Yes	Yes	Yes	Yes
1353	0	1997.71	T3	116.799	61.3	0	58	Female	165	63.5	23.3242	No	No	No	No	4	No	81	120	77	2	8.27	117.1	4.92	2.6	48.3	6.31	73	342	4.29	135.4	219.259	143.483	60.3252	145.399	482	63	54	35	Yes	No	Yes	Yes
896	1	2014.32	T3	100.773	53	0	64	Female	155	45	18.7305	No	Yes	No	No	4	No	93	86	60	2	10.8	145.2	7.81	1.82	43.9	14.25	122	645	3.19	129.3	250.195	178.911	40.6035	160.094	1837	73	58	41	Yes	No	Yes	No
314	0	2023.68	T3	106.758	56	1	44	Male	177	76	24.2587	Yes	Yes	No	No	0.1	No	115	103	83	4	8.03	148.4	4.21	2.92	41.4	7.12	101	415	4.04	134.3	174.788	152.34	32.8695	112.143	1552	81	69	30	Yes	Yes	Yes	Yes
850	0	2025.64	T3	120.396	53.8	2	32	Male	175	103	33.6327	No	Yes	No	No	0.3	No	59	124	74	3	9.27	131	5.2	2.98	38.9	2.43	95	743	4.19	138	134.572	146.14	23.5887	98.6085	2932	72	64	24	Yes	Yes	Yes	No
1300	1	2041.54	T3	96.0485	43.4	1	66	Female	150	50	22.2222	No	Yes	No	No	12	Yes	85	118	72	4	7.5	114.3	5.14	1.38	36.5	6.23	75	495	3.37	136.9	207.658	196.625	41.7636	116.01	7003	70	63	21	Yes	Yes	Yes	Yes
1736	0	2054.61	T3	118.585	59.3	0	49	Male	163	69	25.9701	No	No	Yes	No	0.1	No	66	136	109	3	8.9	146	4.7	2.4	47.3	5.4	93	669	3.63	141.7	240.141	123.998	46.7907	167.054	4945	56	44	27	Yes	Yes	Yes	Yes
733	0	2074.65	T3	109.862	47.45	1	50	Male	168	80	28.3447	No	No	No	No	5	No	100	129	66	2	6.19	156	3.68	1.79	38.5	4.01	92	342	3.99	141.2	163.574	158.54	33.2562	110.983	74.08	65	52	40	Yes	Yes	Yes	Yes
1551	0	2088.7	T3	108.59	49.95	0	63	Male	162	66	25.1486	No	No	No	No	0.2	No	114	134	80	3	5.87	135.4	3.71	1.67	41.6	7.77	114	522	4.25	143.5	238.207	132.855	63.8055	148.88	4181	71	59	34	Yes	Yes	Yes	Yes
1210	0	2090.03	T3	106.061	55.7	0	48	Female	158	52.5	21.0303	No	No	Yes	No	0.6	No	79	103	72	4	6.4	127.9	3.48	2.26	44.4	4.66	84	392	4.43	137.9	252.515	157.655	69.606	156.227	2177	65	54	35	Yes	Yes	Yes	Yes
348	0	2090.92	T3	116.642	50.8	1	44	Male	166	80	29.0318	No	No	No	No	0.1	No	91	110	80	4	9.85	167.1	6.7	1.72	42.2	10.97	133	812	3.9	144.8	161.254	162.083	32.0961	108.276	734.4	82	70	30	Yes	Yes	Yes	No
1414	0	2098.82	T3	98.8994	46.3	0	60	Male	165	65	23.8751	No	No	No	No	0.1	No	70	114	70	3	7.06	138	4.05	1.92	36.7	6.43	82	444	4.39	140	186.003	173.597	40.6035	109.049	6481	72	56	43	No	Yes	Yes	No
1052	0	2129.49	T3	93.73	45.1	3	40	Male	165	62	22.7732	No	No	No	No	0.2	No	109	107	89	3	7.32	145.1	4.47	2.1	34.6	6.86	90	693	4.52	139.1	157	218.768	29.7759	88.5543	7391	67	58	28	Yes	Yes	Yes	Yes
1240	1	2131.6	T3	102.728	55.75	0	49	Male	165	61	22.4059	No	Yes	No	No	0.1	No	118	104	77	2	10.5	154	6.64	2.93	41.1	7.61	90	443	4.58	135.8	185.229	188.654	33.6429	100.929	1111	66	58	24	No	Yes	Yes	Yes
791	0	2161.38	T3	101.376	40.5	4	38	Male	164	84	31.2314	No	No	No	No	5	No	114	116	96	2	5.84	175	3.03	2.26	29.2	7.28	198	563	4.54	140.4	254.835	100.97	49.4976	185.616	7837	67	55	35	Yes	No	Yes	Yes
1659	0	2228.72	T3	119.702	55.95	0	34	Male	172	80	27.0416	Yes	No	No	No	0.1	No	106	107	75	3	8.31	163.2	5.53	1.85	46.7	7.48	86	485	4.86	142	189.483	147.026	27.4557	124.131	686.9	68	58	28	Yes	Yes	Yes	Yes
1452	0	2285.87	T3	95.8996	41.9	2	65	Male	170	65	22.4913	Yes	Yes	Yes	No	10	No	100	120	85	4	7.33	133.9	5.21	1.1	36.4	8.1	107	733	3.91	141.4	182.136	193.083	28.2291	109.049	9119	65	55	35	Yes	Yes	Yes	Yes
2109	0	2343.4	T3	87.4107	45.15	0	71	Female	150	40	17.7778	No	No	No	No	4	No	72	115	73	3	13.29	155.2	9.9	1.77	36.3	13.06	83	707	3.37	135.6	329.082	178.026	56.0715	221.192	1259	63	49	43	Yes	Yes	Yes	No
1778	0	2359.72	T3	116.464	52.2	0	32	Male	178	87	27.4587	No	No	No	No	0.1	No	98	134	78	2	7.12	149.9	4.75	1.66	43.9	4.79	79	463	4.06	141.2	201.471	134.626	39.8301	127.224	476.9	84	75	23	Yes	Yes	Yes	No
638	0	2371.72	T3	109.063	50.4	2	55	Male	155	64	26.6389	Yes	Yes	Yes	No	6	No	70	104	68	3	7.33	134	4.47	2.1	39.9	8.53	117	389	2.83	139.4	110.983	333.909	24.7488	46.0173	3667	74	63	30	Yes	Yes	Yes	Yes
425	0	2376.58	T3	104.897	47.5	1	36	Male	173	82	27.3982	Yes	No	No	No	0.3	No	106	110	79	4	4.92	143	2.11	2.24	36.3	5.54	107	719	3.81	139.5	162.801	178.026	29.0025	112.916	1293	76	65	30	Yes	Yes	Yes	Yes
2114	1	2397.33	T3	104.804	58.05	0	62	Male	150	53	23.5556	Yes	No	No	No	0.3	Yes	84	102	70	3	10.4	136.4	6.11	3.47	40.7	6.8	72	567	4.49	142.9	257.929	175.369	51.4311	164.734	1035	60	50	37	Yes	Yes	Yes	Yes
1494	0	2446.83	T3	108.219	41.5	1	52	Male	173	90	30.0712	No	No	No	No	0.1	No	110	120	100	4	7.28	125.1	5.23	1.26	35.2	4.03	108	462	3.88	142.9	216.165	125.769	30.5493	161.254	3214	60	52	27	Yes	Yes	Yes	Yes
656	0	2446.91	T3	111.468	56.15	1	65	Female	152	46	19.91	No	No	No	No	0.6	No	81	132	77	2	3.35	97.8	1.71	1.29	49.7	3.11	109	285	3.39	142.2	322.894	164.74	56.4582	227.38	128.3	56	46	37	Yes	Yes	Yes	Yes
729	0	2486.55	T3	86.2431	33.25	5	64	Female	155	50	20.8117	No	No	No	Yes	0.1	No	80	106	66	1	5.99	120.2	5.09	0.35	31.5	6.09	78	226	3.53	141.3	255.222	194.854	44.0838	194.897	8155	69	60	27	No	No	Yes	Yes
19	1	2549.81	T3	78.311	32.25	6	62	Male	156	50	20.5457	Yes	Yes	Yes	Yes	6	No	67	158	135	3	8.74	115.5	6.75	1.07	26.9	2.51	85	379	5.91	127	264.116	193.083	46.7907	132.638	440	68	56	30	Yes	Yes	Yes	Yes
880	0	2553.42	T3	103.579	59	0	60	Female	158	60	24.0346	No	Yes	No	No	3	No	90	111	65	2	10.78	124.3	5.55	4.02	38.9	7.98	102	501	4.64	137.5	296.599	143.483	52.9779	215.005	3497	61	49	40	Yes	Yes	Yes	No
117	1	2555.99	T3	114.063	54.85	0	56	Female	162	67	25.5296	No	No	No	No	3	No	76	86	64	3	8.02	138.2	5.01	2.21	43.8	13.28	116	713	3.87	137.6	236.66	161.197	38.2833	163.187	15363	79	68	29	Yes	No	Yes	Yes
860	1	2558.51	T3	104.385	47.55	1	55	Male	169	67	23.4586	Yes	No	No	No	4	No	85	155	94	2	5.11	129	2.93	1.33	40.9	5.25	88	422	3.99	138.2	201.471	189.54	36.3498	145.013	1615	74	61	37	Yes	Yes	Yes	Yes
1770	0	2599.01	T3	116.565	53.05	0	47	Female	156	66	27.1203	Yes	Yes	No	No	1	No	70	102	80	4	18.57	140.1	15.78	1.85	43.8	6.22	57	305	4.17	139.9	254.062	154.998	58.3917	157	9636	77	64	34	Yes	Yes	Yes	No
899	0	2619.97	T3	103.005	49.5	1	51	Male	165	66	24.2424	No	No	No	No	0.1	No	76	124	68	1	8.41	148	5.15	2.1	39	5.06	85	408	3.94	141.3	163.574	242.682	35.5764	91.2612	669.2	63	52	34	Yes	Yes	Yes	Yes
1741	0	2664.02	T3	111.911	50.3	1	42	Male	160	65	25.3906	Yes	Yes	No	No	0.1	No	94	110	57	3	15.36	137.9	12.93	1.36	43.5	5.9	92	880	4.02	136.5	214.232	191.311	42.9237	135.732	3914	59	45	44	Yes	Yes	Yes	Yes
2210	0	2665.99	T3	102.835	56.5	0	61	Female	158	60	24.0346	No	Yes	Yes	No	10	No	90	112	76	3	7.32	146.2	2.71	3.62	38.4	3.87	77	608	3.74	145.6	220.032	201.94	40.6035	124.131	3069	56	51	17.9	Yes	No	Yes	Yes
499	0	2688.73	T3	97.115	47.5	2	34	Male	172	72	24.3375	Yes	No	No	No	0.1	No	80	110	74	3	7.32	141.3	3.65	2.52	34.9	4.79	92	449	3.86	140.5	182.522	204.597	38.67	117.557	2496	65	54	37	Yes	Yes	Yes	Yes
408	0	2716.7	T3	89.8199	42	3	57	Male	164	56	20.8209	Yes	Yes	No	No	0.2	No	86	110	77	2	4.64	127	2.3	1.52	34.4	3.98	57	359	3.41	139.9	212.298	228.511	37.8966	147.719	5103	64	52	38	Yes	Yes	Yes	No
624	1	2773.02	T3	95.5462	52.4	0	41	Male	172	60	20.2812	Yes	No	No	No	0.6	No	100	107	77	2	6.9	141	2.7	2.7	38.9	7	66	536	4.93	139.9	267.596	172.711	61.0986	166.668	1567	75	63	33	Yes	Yes	Yes	Yes
1559	0	2824.72	T3	116.696	53.8	1	44	Male	189	110	30.7942	Yes	No	No	No	0.3	No	104	134	93	2	9.45	137.6	5.58	2.86	39.5	6.01	63	573	3.94	142.7	164.734	155.883	27.8424	100.542	517.1	76	63	34	Yes	Yes	Yes	Yes
1056	0	2874.64	T3	106.732	58.1	0	54	Male	162	60	22.8624	Yes	No	No	No	4	No	48	152	83	2	7.14	150.9	3.24	2.98	43.2	3.99	79	294	3.36	143.3	195.284	245.339	33.2562	107.889	180.1	63	48	44	Yes	Yes	Yes	No
305	0	2874.88	T3	110.347	49	0	55	Female	151	60	26.3146	No	Yes	No	Yes	3	No	97	123	65	3	7.56	114.4	5.38	1.62	40.9	7.83	85	539	4.02	135.6	271.85	176.254	47.9508	201.471	1863	67	54	39	Yes	Yes	Yes	Yes
1772	1	2930.09	T3	98.6446	45.05	1	62	Male	160	58	22.6562	Yes	Yes	No	No	5	No	93	100	63	4	6	131	3.6	1.41	38	8.89	124	640	4.76	138	228.153	221.425	47.1774	127.224	2467	77	70	20	Yes	Yes	Yes	Yes
162	1	2935.71	T3	113.155	54.1	0	60	Female	151	56	24.5603	No	Yes	No	No	0.1	No	76	134	84	3	5.91	122.3	3.21	1.82	45	4.42	73	290	4.24	143.6	220.032	238.253	40.9902	123.744	1212	62	52	33	No	Yes	Yes	No
146	0	2958.36	T3	104.025	53.8	0	68	Male	165	57	20.9366	No	No	Yes	No	0.99	No	63	121	80	3	8.54	152.7	5.1	2	43.8	11.54	148	886	4.7	134	204.178	254.196	28.6158	131.091	2326	64	53	35	Yes	Yes	Yes	Yes
523	1	3006.24	T3	115.578	58.8	0	43	Male	165	75.5	27.7319	Yes	No	No	No	3	No	120	108	79	3	11.47	142.2	7.48	3.14	43.1	8.43	123	1006	4.77	128.6	200.697	198.397	30.5493	150.04	5302	75	65	29	Yes	Yes	Yes	Yes
592	0	3072.52	T3	117.848	54.55	1	33	Male	170	89	30.7958	Yes	Yes	No	No	2	No	103	101	73	4	12.35	153.9	8.65	2.75	40.8	4.46	67	456	3.69	137.9	172.468	200.168	31.7094	105.569	832.2	84	67	40	Yes	Yes	Yes	Yes
499	0	3089.24	T3	108.265	49.7	3	49	Male	177	67	21.3859	No	No	No	No	0.1	No	80	123	87	4	14.02	145.9	12.44	0.74	46	7.43	121	609	3.97	139.8	187.936	245.339	38.67	115.237	286.8	59	50	34	Yes	Yes	No	No
302	0	3095.68	T3	112.03	48.3	1	41	Male	179	89	27.7769	Yes	Yes	No	No	0.6	No	74	97	51	3	6.01	151	3.8	1.56	40.5	8.53	83	427	4.07	136.7	211.138	164.74	51.8178	135.732	108.8	69	59	30	Yes	Yes	Yes	No
125	1	3185.2	T3	99.7359	42.5	2	62	Female	156	57	23.4221	No	No	No	No	0.6	No	94	138	84	3	7.22	114.4	5.43	1.06	37.2	10.16	185	730	3.18	142.7	288.091	193.968	38.67	185.616	35000	81	69	29	Yes	Yes	Yes	Yes
2137	0	3303.36	T3	105.406	51.35	0	48	Male	168	68	24.093	No	No	No	No	0.1	No	62	124	88	4	9.05	147.3	5.44	2.11	40.8	7.69	107	383	4.24	141.5	232.407	209.025	36.7365	149.266	2418	66	59	22	Yes	Yes	Yes	Yes
365	0	3358.18	T3	109.757	41.8	1	36	Male	173	92	30.7394	Yes	Yes	No	No	0.3	No	99	115	75	3	6.16	155.6	4.46	1.28	35.4	4.57	78	777	4.15	139	203.018	179.797	40.9902	142.306	2965	79	67	30	Yes	Yes	Yes	Yes
297	0	3498.15	T3	98.0104	49.4	0	46	Male	160	60	23.4375	Yes	Yes	No	No	1	No	79	119	74	4	11.08	143.1	5.95	2.56	36.6	6.56	89	364	4.31	136.1	223.899	260.396	33.6429	157.774	793	73	64	27	Yes	Yes	Yes	Yes
2211	0	3843.33	T3	107.325	48.45	1	47	Male	163	71	26.7229	No	Yes	No	No	0.1	No	105	128	80	4	8.61	129.5	5.97	1.93	38.8	6.29	105	641	3.37	142.8	173.628	311.766	36.3498	81.9804	2221	61	51	33	Yes	Yes	Yes	Yes
803	0	3925.33	T3	130.45	67	1	38	Male	163	79.6	29.9597	No	No	No	No	0.1	No	114	122	88	2	9.2	151.2	4.1	3.34	50.3	6.2	82	599	3.86	142	177.882	277.224	31.3227	133.025	3470	66	57	28	Yes	No	Yes	Yes
1501	0	4090.86	T3	125.946	57.5	0	60	Female	146	70	32.8392	No	No	No	No	0.3	No	91	123	75	3	11.16	136	7.34	2.82	43.4	4.12	66	419	4.03	140.1	291.959	200.168	46.404	209.205	2316	71	52	38	Yes	Yes	Yes	No
898	0	4222.6	T3	116.383	47.55	1	54	Male	175	90	29.3878	Yes	Yes	No	No	10	No	125	114	72	4	11.91	129	8.38	1.21	41.5	8.11	154	672	4.78	136.3	183.296	255.967	49.1109	100.542	1684	86	73	42	Yes	Yes	Yes	Yes
569	0	4321.57	T3	88.7829	36.2	4	36	Male	168	64	22.6757	Yes	No	No	No	2	No	95	158	64	4	3.6	78	2.2	0.96	31.4	20.36	1030	382	3.42	137.5	188.71	357.823	26.6823	92.4213	35000	78	60	44	Yes	No	Yes	No
262	0	4898.41	T3	107.208	52.6863	0	55	Male	164	62	23.0518	Yes	Yes	Yes	No	1	No	84	158	88	3	9.32	146	5.20206	1.87726	43.3	6.3	90	438	4.28	138.4	316.321	249.767	66.5124	198.377	1848	69	56	38	Yes	Yes	Yes	Yes
1652	0	5194.61	T3	116.45	61	0	30	Female	160	72	28.125	No	No	No	No	0.2	No	79	105	65	1	10.94	130.9	6.3	3.76	42.2	8.59	66	575	4.29	136.3	260.249	277.224	44.0838	159.32	421.1	68	52	44	Yes	Yes	Yes	No
2162	0	5299.55	T3	112.696	52.75	0	38	Male	169	86	30.111	Yes	No	Yes	No	0.1	No	132	125	93	4	8.06	142.8	4.26	2.91	38.2	3.82	68	578	4	138.6	267.596	230.282	34.803	183.683	1241	58	47	39	Yes	Yes	Yes	Yes
1032	0	5611.41	T3	100.68	46.5	2	52	Male	163	73	27.4756	Yes	Yes	No	No	0.3	No	100	135	102	4	7.55	159.2	4.17	2.62	33.4	6.56	93	519	5.45	133.6	364.658	210.797	35.1897	277.264	7150	56	50	23	No	Yes	Yes	Yes
400	0	6019.07	T3	112.391	49.6	0	52	Male	160	71	27.7344	No	No	Yes	No	1	No	92	153	93	2	5.72	147.7	3.14	1.74	40.9	4.8	80	360	4.24	138.8	210.365	402.993	36.7365	122.584	384.2	73	61	34	Yes	Yes	Yes	Yes
772	0	6085.71	T3	127.065	62.35	0	32	Male	165	81	29.7521	Yes	No	No	No	0.5	No	54	130	79	2	8.11	159.9	4.41	2.81	48.3	5.21	89	388	3.58	137.6	267.596	280.767	31.3227	189.483	161.2	66	56	31	Yes	Yes	Yes	Yes
1407	0	6195.77	T3	129.374	61.65	0	58	Female	150	63	28	No	No	No	No	1	No	76	96	66	3	6.4	138.9	3.29	2.01	51.6	5.16	74	456	4.39	142.2	189.483	519.02	37.8966	68.8326	501.6	70	60	30	Yes	Yes	Yes	Yes
771	0	7404.48	T3	121.215	54.7	0	51	Male	158	75	30.0433	Yes	Yes	Yes	No	3	No	103	108	75	2	7.24	156.2	3.96	2.16	43.9	9.56	105	491	4.43	136.8	182.136	542.048	39.8301	107.889	1242	76	66	36	Yes	Yes	Yes	Yes
1306	0	7503.42	T3	108.892	55.1	0	27	Male	168	69	24.4473	Yes	Yes	No	No	0.3	No	123	133	87	4	11.31	136.7	7.25	2.48	42.7	6.2	148	844	4.52	138.9	272.237	399.451	41.3769	145.786	5214	56	52	17	Yes	Yes	Yes	Yes
718	0	8206.24	T3	118.285	53.75	0	47	Male	175	87	28.4082	No	No	No	No	1	No	62	132	75	3	7.42	139.3	4.83	1.95	44	8.6	107	545	4.63	136.5	250.582	376.422	37.1232	121.811	264.8	75	60	39	Yes	Yes	Yes	No
841	0	8606.41	T3	122.215	58.9	0	35	Male	177	90	28.7274	No	No	No	No	0.6	No	91	150	113	3	8.73	171.2	5.49	2.54	46.2	4.64	125	601	3.7	141.3	265.276	360.48	45.6306	166.668	1933	84	67	41	Yes	Yes	Yes	Yes
1369	0	10340.1	T3	109.427	59.75	0	37	Male	165	54	19.8347	No	No	No	No	2	No	78	127	76	2	7.24	139.2	4.03	2.19	48.8	4	51	613	3.61	135	206.885	925.556	26.6823	29.0025	63.68	62	49	42	Yes	Yes	Yes	Yes
